1  
2  
3  
4  
5  
6  
7  
8  
9  
10  
11  
12  
13  
14  
15  
16  
17  
18  
19  
20

# Light-induction of endocannabinoids and activation of *Drosophila* TRPC channels

Takaaki Sokabe<sup>1,2,3,\*</sup>, Heather B. Bradshaw<sup>4</sup>, Makoto Tominaga<sup>2,3</sup>,  
Emma Leishman<sup>4</sup>, and Craig Montell<sup>1,\*</sup>

<sup>1</sup>Department of Molecular, Cellular, and Developmental Biology and the Neuroscience  
Research Institute, University of California, Santa Barbara, California 93106, USA

<sup>2</sup>Division of Cell Signaling, National Institute for Physiological Sciences, and Thermal  
Biology Group, Exploratory Research Center on Life and Living Systems (ExCELLS),  
National Institutes of Natural Sciences, Okazaki, Aichi, 444-8787, Japan

<sup>3</sup>Department of Physiological Sciences, SOKENDAI, Okazaki, Aichi, Japan

<sup>4</sup>Department of Psychological and Brain Sciences,  
Indiana University, Bloomington, Illinois, 47405, USA

\*Correspondence: T.S. ([sokabe@nips.ac.jp](mailto:sokabe@nips.ac.jp)) or C.M. ([cmontell@ucsb.edu](mailto:cmontell@ucsb.edu))

Running title: Endocannabinoids and phototransduction

Character count (including spaces): 63,181

ORCID: CM, 0000-0001-5637-1482; TS, 0000-0003-1280-9424

21 **Abstract**

22 *Drosophila* phototransduction represents a classical model for signaling cascades  
23 that culminate with activation of TRP channels. TRP and TRPL are the canonical TRP  
24 (TRPC) channels, which are gated by light stimulation of rhodopsin and engagement of  
25 Gq and phospholipase C $\beta$  (PLC). Despite decades of investigation, the mechanism of  
26 TRP activation in photoreceptor cells is unresolved. Here, using a combination of  
27 genetics, lipidomics and Ca<sup>2+</sup> imaging, we found that light increased the levels of an  
28 abundant endocannabinoid, 2-linoleoyl glycerol (2-LG) *in vivo*. The elevation in 2-LG  
29 strictly depended on the PLC encoded by *norpA*. Moreover, this endocannabinoid  
30 upregulated TRPC-dependent Ca<sup>2+</sup> influx in a heterologous expression system and in  
31 dissociated ommatidia from compound eyes. We propose that 2-LG is a physiologically  
32 relevant endocannabinoid that activates TRPC channels in photoreceptor cells.

33

34 **Keywords**

35 *Drosophila melanogaster*/endocannabinoid/lipidomics/phototransduction/TRP channel

36

## 37 **Introduction**

38 Phototransduction is crucial in animals ranging from worms to humans as it enables  
39 positive or negative phototaxis, entrainment of circadian rhythms and reception of visual  
40 information from the surrounding environment. In some photoreceptor cells, such as  
41 mammalian rods and cones, the phototransduction cascade culminates with closing of  
42 cation channels (Yau & Hardie, 2009). In contrast, the cascade in *Drosophila*  
43 photoreceptor cells and in mammalian intrinsically activated retinal ganglion cells leads  
44 to opening of the cation channels (Montell, 2012; Montell, 2021; Yau & Hardie, 2009).

45 In *Drosophila*, the main site for light reception and transduction is the compound eye,  
46 which is comprised of ~800 repeat units called ommatidia. A single ommatidium harbors  
47 eight photoreceptor cells, each of which includes a rhabdomere. This specialized  
48 portion of the photoreceptor cells consists of thousands of microvilli, thereby enabling  
49 rhodopsin to be expressed at very high levels for efficient photon capture (Montell,  
50 2012; Montell, 2021; Yau & Hardie, 2009).

51 The *Drosophila* phototransduction cascade has been studied for over 50 years  
52 beginning with the seminal work by Pak and colleagues (Pak *et al*, 1970). This has led  
53 to the elucidation of the critical signaling proteins that transduce light into an electrical  
54 signal (Hardie & Juusola, 2015; Montell, 2021). Light-activation of rhodopsin engages a  
55 heteromeric Gq protein and stimulation of the phospholipase C (PLC) encoded by  
56 *norpA* (Bloomquist *et al*, 1988), which in turn induces opening of the Ca<sup>2+</sup> permeable  
57 cation channels. These include the Transient Receptor Potential (TRP) channel, which  
58 is the classical member of the TRP family (Hardie & Minke, 1992; Montell & Rubin,  
59 1989), and a second canonical TRP channel (TRPC), TRPL (Niemeyer *et al*, 1996;

60 Phillips *et al*, 1992). Related TRP channels are conserved from flies to humans (Wes *et*  
61 *al*, 1995; Zhu *et al*, 1995). Extensive studies of fly photoreceptor cells have also  
62 revealed mechanisms underlying the dynamic movements of signaling proteins, as well  
63 as proteins that function in the visual cycle, post-translational modification of signaling  
64 proteins, and the composition of the signalplex, which is a large macromolecular  
65 assembly that clusters together many of the key proteins that function in  
66 phototransduction through interactions with the PDZ-containing protein, INAD (Hardie &  
67 Juusola, 2015; Montell, 2012; Montell, 2021). The fly eye has also provided an  
68 outstanding tissue to model human diseases (Lin *et al*, 2018; Liu *et al*, 2017; McGurk *et*  
69 *al*, 2015; Pak, 1994; Warrick *et al*, 1998; Zhuang *et al*, 2016).

70 Stimulation of PLC is essential for activation of the TRP and TRPL channels.  
71 However, the mechanism linking activity of PLC to opening of TRP and TRPL is still  
72 under debate. PLC hydrolyzes phosphatidylinositol 4,5-bisphosphate (PIP<sub>2</sub>) to release  
73 inositol phosphate 1,4,5 trisphosphate (IP<sub>3</sub>), a H<sup>+</sup> and diacylglycerol (DAG). Consistent  
74 with this conclusion, in fly heads light exposure causes a decrease in PIP<sub>2</sub> levels and an  
75 increase in DAG (Huang *et al*, 2004). IP<sub>3</sub> and the release of Ca<sup>2+</sup> from the endoplasmic  
76 reticulum does not seem to play a role in *Drosophila* phototransduction (Acharya *et al*,  
77 1997; Raghu *et al*, 2000). Rather, multiple other models have been proposed.  
78 According to one study, PIP<sub>2</sub> depletion accompanied by local intracellular acidification  
79 by H<sup>+</sup> promotes channel activation (Huang *et al*, 2010). DAG has also been reported to  
80 activate TRP and TRPL in excised rhabdomeric membranes (Delgado & Bacigalupo,  
81 2009; Delgado *et al*, 2019; Delgado *et al*, 2014). Mechanical contraction of the  
82 rhabdomeral membrane has been proposed to contribute to activation of the channels

83 (Hardie & Franze, 2012). This may occur due to cleavage of the head group of PIP<sub>2</sub>,  
84 leaving the smaller lipid, DAG, in the membrane (Hardie & Franze, 2012).  
85 Polyunsaturated fatty acids (PUFAs) have been reported to activate TRP and TRPL  
86 (Chyb *et al*, 1999; Delgado & Bacigalupo, 2009; Lev *et al*, 2012), although a more  
87 recent study showed that PUFAs do not increase with illumination (Delgado *et al.*, 2014).

88 In this work, to identify physiologically relevant lipids that could activate TRP and  
89 TRPL we performed a lipidomic analysis using fly heads exposed to light or that were  
90 maintained in the dark. We found that several lipids increased in concentration upon  
91 light stimulation in control flies but not in the *norpA* mutant that eliminates the PLC  
92 required for phototransduction. The lipids that were upregulated by light included  
93 endocannabinoids and an *N*-acyl glycine (NAG). Endocannabinoids are related to plant-  
94 derived cannabinoids, which in mammals are capable of activating the same receptors  
95 as cannabinoids, such as the G-protein coupled receptors, CB1 and CB2 (Gregus &  
96 Buczynski, 2020). However, *Drosophila* has no CB1 and CB2 homologs (McPartland *et*  
97 *al*, 2001), and no cannabinoid receptor has been identified in flies. We found that the  
98 endocannabinoids and the NAG activated TRPL channels *in vitro* in a dose-dependent  
99 manner and induced Ca<sup>2+</sup> influx in dissociated ommatidia via the TRP and TRPL  
100 channels. One endocannabinoid, 2-linoleoyl glycerol, was ~60—100 times more  
101 abundant than the other lipids that increased upon light stimulation. We propose that 2-  
102 linoleoyl glycerol is a key lipid that contributes to activation of the TRPC channels in  
103 photoreceptor cells.

104

105

## 106 **Results**

### 107 **Endocannabinoids and NAG are upregulated by light**

108 To evaluate lipids that are increased by light stimulation of *Drosophila* photoreceptor  
109 cells, we performed lipidomic analysis (Fig 1A). In addition to using control flies ( $w^{1118}$ )  
110 maintained in the dark or stimulated with light, we also analyzed *norpA*<sup>P24</sup> mutant flies  
111 (in a  $w^{1118}$  background) to identify light-induced changes in lipid levels that were PLC-  
112 dependent. Half the control and *norpA*<sup>P24</sup> flies were then exposed to blue light for 5  
113 minutes since the major rhodopsin in the compound eyes (rhodopsin 1) is maximally  
114 activated by 480 nm light (Britt *et al*, 1993). The flies were then immediately immersed  
115 in liquid nitrogen. We mechanically separated the heads from the bodies by vortexing,  
116 and collected them on sieves. We then used whole heads for the following lipidomic  
117 analysis since the retina represents a significant proportion (~20-25%) of the mass of  
118 the heads. In addition, ~90% of PLC activity that is in the heads is due to PLC activity in  
119 the retina (Inoue *et al*, 1985). Thus, the vast majority of NORPA-dependent changes in  
120 lipid levels is from the retina.

121 To quantify the amounts of lipid metabolites in each sample, we used liquid  
122 chromatography-tandem mass spectrometry (LC/MS/MS). We analyzed 14 lipids that  
123 are produced in *Drosophila* larvae (Tortoriello *et al*, 2013), and which we could reliably  
124 identify in *Drosophila* heads in our preliminary studies. These included lipids that are  
125 known or could potentially depend on PLC for their biosynthesis since PLC activity is  
126 required for the light response. PLC hydrolyzes PIP<sub>2</sub> to generate IP<sub>3</sub>, H<sup>+</sup> and DAG. DAG  
127 can be metabolized to 2-linoleoyl glycerol (2-LG; Fig 1B) and other 2-monoacylglycerols  
128 (2-MAGs). In mammals 2-MAGs such as 2-arachidonoyl glycerol function as

129 endocannabinoids (Gregus & Buczynski, 2020) and recently, 2-LG has been shown to  
130 activate and bind to mammalian CB1 when it was ectopically expressed in *Drosophila*  
131 (Tortoriello *et al*, 2020). We did not include long PUFAs (C20 and C22) such as  
132 arachidonic acid (C20:4) do not appear to be synthesized in *Drosophila* (Shen *et al*,  
133 2010; Tortoriello *et al.*, 2013; Yoshioka *et al*, 1985).

134 Four of the lipids that we characterized displayed significant changes in control fly  
135 heads. Most prominent among these four is the endocannabinoid 2-LG (Fig 1C;  
136 nmoles/gram: dark  $8.0 \pm 0.4$ , light  $10.4 \pm 0.5$ ). The 30% light-dependent rise in 2-LG  
137 levels is highly significant ( $p=0.0017$ ). Moreover, the light-induced rise in 2-LG that we  
138 observed in controls heads did not occur in *norpA*<sup>P24</sup> heads (Fig 1C) demonstrating that  
139 the change in 2-LG levels was PLC-dependent. In contrast, to 2-LG, we did not detect  
140 significant light dependent changes in two other 2-MAGs analyzed: 2-palmitoyl glycerol  
141 (2-PG) and 2-oleoyl glycerol (2-OG; Fig EV1A and B).

142 Control flies also exhibited a light-dependent increase in the anandamide-related  
143 lipid, linoleoyl ethanolamide (LEA; Fig 1D). However, the absolute levels of LEA were  
144 ~100 fold lower than 2-LG (Fig 1C and D). Light did not impact the concentration of LEA  
145 in *norpA*<sup>P24</sup> flies (Fig 1D). We also quantified a possible precursor of LEA, phospho-LEA  
146 (Liu *et al*, 2006), and found a similar light-dependent rise in phospho-LEA (Fig 1E),  
147 which was present at low levels comparable to LEA (Fig 1D). There was a small light-  
148 induced increase in phospho-LEA in *norpA*<sup>P24</sup>; however, this change was not significant  
149 (Fig 1E). In contrast to LEA and phospho-LEA, light did not significantly affect the  
150 biosynthesis of other types of *N*-acyl ethanolamides, including those that contained a  
151 saturated fatty acid, such as stearoyl ethanolamide (S-EA, C18:0) and palmitoyl

152 ethanolamide (P-EA, C16:0; Fig EV1C and D). We also did not detect a significant light-  
153 dependent change in the concentration of oleoyl ethanolamide (O-EA), which is  
154 conjugated to the monosaturated fatty acid, oleic acid (OA, C18:1; Fig EV1E). Similarly,  
155 light had no impact on OA levels either in control or *norpA*<sup>P24</sup> eyes (Fig EV1F).

156 The fourth lipid that displayed a light-induced increase in control flies was the NAG—  
157 linoleoyl glycine (LinGly; Fig 1B and F). It has been proposed that NAG is produced by  
158 conjugation of glycine and fatty acid through fatty acid amide hydrolase (FAAH)  
159 (Bradshaw *et al*, 2009). The level of LinGly were unaffected by light in *norpA*<sup>P24</sup> (Fig 1F)  
160 indicating that the increase in control flies was PLC dependent (Fig 1B). As with LEA  
161 and phospho-LEA, the absolute levels of LinGly were much lower than 2-LG (Fig 1C  
162 and F). In contrast to LinGly, the concentrations of all three other *N*-acyl glycine  
163 molecules analyzed were not impacted by light (Fig EV1G—I). Thus, all four lipids that  
164 displayed light-dependent increases were conjugated to LA. However, linoleic acid (LA)  
165 showed only a modest increase in light-stimulated control flies, which was above the  
166 threshold for statistical significance (Fig 1G;  $p=0.084$ ). A previous lipidomics study  
167 focusing on PUFAs found that none of the PUFAs analyzed, including LA, changed in  
168 the presence of light (Delgado *et al.*, 2014). Thus, even though several reports implicate  
169 PUFAs as activators of TRP and TRPL (Chyb *et al.*, 1999; Delgado & Bacigalupo, 2009;  
170 Lev *et al.*, 2012), the effects may not be physiologically relevant. Also consistent with  
171 previous studies (Shen *et al.*, 2010; Yoshioka *et al.*, 1985), we did not detect  
172 arachidonic acid in any our samples. Taken together, our data indicate that light  
173 stimulation promotes biosynthesis of LA-containing endocannabinoids and a NAG, and  
174 these increases are all PLC dependent.



175

176 **Endocannabinoids and NAG activate TRPL channel *in vitro***

177 To test whether the linoleoyl conjugates that rise in concentration in response to light  
178 increase channel activity *in vitro* we focused on TRPL since TRP is largely retained in  
179 the endoplasmic reticulum in tissue cultures and has been refractory to functional  
180 analyses. To conduct the current analysis, we used a *Drosophila* cell line (Schneider 2  
181 cells; S2 cells) that contains an integrated *trpl::GFP* gene that can be induced with  
182  $\text{CuSO}_4$  (Parnas *et al*, 2007). Cells that are not exposed to  $\text{CuSO}_4$  do not express  
183 *trpl::GFP* and provide a negative control. We introduced a cell permeant, ratiometric  
184  $\text{Ca}^{2+}$  indicator (Fura-2 AM) into cells and stimulated with different lipids. We then  
185 determined the increase in intracellular  $\text{Ca}^{2+}$  ( $\text{Ca}^{2+}_i$ ) by measuring the change in  
186 fluorescence. Finally, we exposed the cells to an ionophore (ionomycin) to determine  
187 the maximum possible increase in  $\text{Ca}^{2+}$ , which we calculated by normalizing the  
188 maximum value with each treatment relative to the ionomycin response (see Methods).

189 We focused this analysis on the endocannabinoids (2-LG and LEA) and LinGly, and  
190 performed dose response analysis over a 1000-fold concentration range (100 nM—100  
191  $\mu\text{M}$ ). We did not include phospho-LEA in these experiments since it is amphipathic and  
192 will not flip to the inner leaflet of the plasma membrane when added to the bath solution.  
193 Cells that did not express TRPL ( $\text{Cu}^{2+}$  minus) were unresponsive to 2-LG even at 100  
194  $\mu\text{M}$  2-LG (Fig 2A and EV2A). In contrast, 2-LG robustly stimulated an increase in  $\text{Ca}^{2+}_i$   
195 in cells expressing TRPL (exposed to  $\text{Cu}^{2+}$ ) with an  $\text{EC}_{50}=5.23 \mu\text{M}$  (Fig 2A—D). 100  $\mu\text{M}$   
196 2-LG induced  $\text{Ca}^{2+}_i$  that was  $51.5 \pm 3.3\%$  of the maximum possible value (Fig 2A—C).  
197 LEA and LinGly also stimulated an increase in  $\text{Ca}^{2+}_i$  in TRPL-expressing cells ( $\text{EC}_{50} \mu\text{M}$ :

198 LEA=7.04, LinGly=2.99; Fig 2A and D—F), but not in  $\text{Cu}^{2+}$  minus cells, which did not  
199 express TRPL (Fig 2A and EV2B and C). In contrast to the efficacy of these linoleoyl  
200 conjugates in stimulating a rise in  $\text{Ca}^{2+}_i$  in TRPL-positive cells, a membrane-permeable  
201 analogue of DAG, 1-oleoyl-2-acetyl-*sn*-glycerol (OAG), was not effective at inducing  
202  $\text{Ca}^{2+}_i$  increase even at the highest concentration we tested (Fig 2A and EV2D). OA was  
203 also ineffective at activating TRPL (Fig 2A and EV2E) consistent with the lack of  
204 increase of OA level upon light stimulation (Fig EV1F).

205 Since 2-LG, LEA and LinGly contain LA in their structures, channel activation might  
206 result from generation of LA either by hydrolysis or degradation. This is plausible since  
207 LA activates a TRPL-dependent elevation in  $\text{Ca}^{2+}_i$  (Fig 2A and EV2F and G). To assess  
208 whether generation of LA from 2-LG, LEA and LinGly activated TRPL, we tested the  
209 effects of addition of a MAG lipase inhibitor (JZL 184) and MAG lipase/fatty acid amide  
210 hydrolase (FAAH) inhibitor (IDFP) (Long *et al*, 2009; Nomura *et al*, 2008). We found that  
211 neither inhibitor reduced  $\text{Ca}^{2+}_i$  (Fig 3A), supporting the idea that the endocannabinoids  
212 (2-LG and LEA) and NAG promote TRPL activation.

213 LA is generated in *Drosophila*, but arachidonic acid is not detectable *in vivo* unless it  
214 is supplied in the diet. Nevertheless, we tested the effects of 2-arachidonoyl glycerol (2-  
215 AG) and found that it evoked  $\text{Ca}^{2+}_i$  increases in TRPL-expressing cells (Fig 3B and  
216 EV3A). We tested a stable 2-AG analog, 2-AG ether (Laine *et al*, 2002), which also  
217 evoked  $\text{Ca}^{2+}_i$  increase (Fig 3C and EV3B). Anandamide (AEA) is similar in structure to  
218 LEA. Methanandamide, which is a stable analog of AEA (Abadji *et al*, 1994), also  
219 stimulated an increase in  $\text{Ca}^{2+}_i$  in TRPL-expressing cells (Fig 3D and EV3C). Thus,  
220 arachidonic acid conjugates stimulate TRPL. Since the stable 2-AG analogs activate

221 TRPL to a comparable extent as 2-AG, this supports the idea that endocannabinoids  
222 themselves rather than PUFA metabolites are sufficient to activate TRPL.

223 2-LG, LEA and LinGly all increase upon light stimulation *in vivo*. Therefore, we  
224 tested whether there were synergistic or additive effects resulting from applying  
225 mixtures of these lipids. We tested all combinations of 2-LG, LEA, LinGly and LA while  
226 maintaining the same total concentration (6  $\mu$ M). We did not observe either synergistic  
227 or additive effects on the increase in  $Ca^{2+}_i$  relative to the same concentration of the  
228 single lipids (Fig 3E—G).

229

### 230 **Endocannabinoid acts on TRP and TRPL channels in ommatidia**

231 To address whether the endocannabinoid 2-LG activates TRP and TRPL in  
232 photoreceptor cells we isolated ommatidia from flies (Fig EV4A) expressing a  
233 genetically encoded  $Ca^{2+}$  sensor, GCaMP6f, which is expressed in six out of the eight  
234 photoreceptor cells under control of the *rhodopsin 1* (*ninaE*) promoter  
235 (*ninaE>GCaMP6f*) (Asteriti *et al*, 2017). We performed all analyses in a *norpA<sup>P24</sup>*  
236 genetic background to prevent light activation of the TRP and TRPL channels. We  
237 stimulated the ommatidia with 2-LG, following by ionomycin to confirm that the  
238 ommatidia were viable. An increase in  $Ca^{2+}$  was assessed by monitoring the change in  
239 fluorescence and dividing it by the basal level of fluorescence ( $\Delta F/F_0$ ).

240 We focused this analysis primarily on 2-LG since it is the most abundant lipid that is  
241 induced by light. When we applied 2-LG to the bath solution, we observed an increase  
242 in  $Ca^{2+}$  in *norpA<sup>P24</sup>* photoreceptor cells (Fig 4A, C, G and H, and EV4B). Since the  
243 *norpA<sup>P24</sup>* mutation removes the PLC required for phototransduction, the change in

244 fluorescence was not due to light stimulation. We introduced the *norpA*<sup>P24</sup> mutation into  
245 a genetic background that removes both TRP and TRPL (*norpA*<sup>P24</sup>;*trpl*<sup>302</sup>;*trp*<sup>343</sup>) and  
246 found that most ommatidia showed significantly lower responses to 2-LG (Fig 4B, D, G  
247 and H, and EV4C and D). The significance of this reduction ( $p=0.024$ ) was not due to  
248 the two outliers in the *norpA*<sup>P24</sup>;*+*;*+* control since the p value would be  $7.6 \times 10^{-4}$  in the  
249 absence of these two values and the one outlier in the *trp*<sup>343</sup> mutant and two in the  
250 *trpl*<sup>302</sup> mutant due to the narrower data distribution. In further support of the conclusion  
251 that the TRPC channels are activated by 2-LG *in vivo*, the percentage of no or low  
252 responding ommatidia ( $\max \Delta F/F_0 \leq 0.2$ ) was significantly higher in the mutant lacking  
253 TRPL and TRP (*norpA*<sup>P24</sup>;*trpl*<sup>302</sup>;*trp*<sup>343</sup>;  $30.2 \pm 3.7\%$ ) compared with the control (Fig 4I;  
254 *norpA*<sup>P24</sup>;*+*;*+*;  $7.8 \pm 2.0\%$ ). Nevertheless, the remaining influx in *norpA*<sup>P24</sup>;*trpl*<sup>302</sup>;*trp*<sup>343</sup>  
255 flies could be due to the Na<sup>+</sup>/Ca<sup>2+</sup> exchanger (CalX), which we can run in reverse in fly  
256 photoreceptor cells (Wang *et al.*, 2005b) or potentially to lipid modulation of voltage-  
257 gated channels (Elinder & Liin, 2017).

258 The reduction in fluorescence ( $\Delta F/F_0$ ) in the *norpA*<sup>P24</sup>;*trpl*<sup>302</sup>;*trp*<sup>343</sup> mutant  
259 demonstrates that the rise in  $\Delta F/F_0$  was due primarily to TRP and TRPL. Elimination of  
260 just TRP or TRPL resulted in only small differences from the *norpA*<sup>P24</sup> control, which  
261 were not statistically significant (Fig 4E—I). The minimal changes upon elimination of  
262 just TRP or TRPL is consistent with analyses using electrophysiological studies showing  
263 that loss of TRPL alone has virtually no effect on the amplitude of the light response  
264 (Niemeyer *et al.*, 1996), while removal of TRP has only minimal effects on the response  
265 amplitude under dim or moderate light conditions (Minke, 1982; Minke *et al.*, 1975). The  
266 2-LG induced an increase in  $\Delta F/F_0$  only in the presence and not the absence of Ca<sup>2+</sup> in

267 the bath solution (Fig 4J and K) demonstrating that the increase in GCaMP6f  
268 fluorescence was due to  $Ca^{2+}$  influx and not to release of  $Ca^{2+}$  from internal stores.

269 We also examined whether LEA and LinGly stimulated a rise in  $Ca^{2+}_i$ . We found that  
270 these lipids induced  $Ca^{2+}_i$  increases in the *norpA*<sup>P24</sup> control, which were significantly  
271 higher than those in the *norpA*<sup>P24</sup>;*trpl*<sup>302</sup>;*trp*<sup>343</sup> mutant (Fig 4L and M). In the absence of  
272 the one outlier for LinGly, the significance is essentially unchanged (p=0.020).

273 Consistent with previous data indicating that LA but not OA is effective in activating the  
274 TRPC channels (Chyb *et al.*, 1999; Delgado & Bacigalupo, 2009), we found that LA  
275 activated ommatidia at a level similar to that of 2-LG, whereas OA only evoked the  
276 minimum  $Ca^{2+}$  increase similar to that observed in ommatidia lacking TRPL and TRP  
277 (Fig 4N).

278

## 279 Discussion

280 Activation of PLC following light stimulation is critical for opening of the TRP and  
281 TRPL channels in photoreceptor cells. However, many lipids could potentially be  
282 generated following stimulation of PLC. To identify candidate lipids that modulate these  
283 TRPC channels *in vivo*, we set out to identify lipids that increase in response to light.  
284 Since phototransduction is dependent on the PLC encoded by *norpA*, we designed the  
285 analysis to find lipids that increased upon light stimulation in wild-type but in not in the  
286 *norpA* mutant. We found that wild-type but not *norpA* mutant flies exhibit light-  
287 dependent increases in the endocannabinoids 2-LG, LEA, phospho-LEA as well as the  
288 NAG (LinGly), and that 2-LG, LEA and LinGly activate TRPC channels *in vitro* and in

289 isolated ommatidia. The results suggest that one or more of these lipids activates the  
290 TRP and TRPL channels in photoreceptor cells.

291 We suggest that the endocannabinoid 2-LG is the relevant lipid that activates the  
292 TRPC channels *in vivo*. 2-LG is generated at levels that are ~60—100-fold higher than  
293 LEA, phospho-LEA or LinGly. In addition, the light-dependent rise in 2-LG was more  
294 significant ( $p=0.0017$ ) than the other three lipids ( $p=0.018—0.039$ ). Moreover, the  
295 statistical significance of LEA and LinGly depended on the one and two outliers,  
296 respectively. In contrast to the highly significant light-dependent rise in 2-LG in control  
297 flies, the levels of 2-LG in either dark or light exposed *norpA*<sup>P24</sup> heads were virtually  
298 identical to the control maintained in the dark. We suggest that enough 2-LG is  
299 generated to activate the TRPC channels since the precursor for 2-LG (DAG) is  
300 estimated to be produced at near millimolar levels (Raghu & Hardie, 2009), and 30  $\mu$ M  
301 2-LA is sufficient to activate the TRPC channels in isolated ommatidia. The TRPC  
302 channels in the rhabdomeres are activated within 20 milliseconds (Ranganathan *et al*,  
303 1991), and our lipidomics analysis was performed following 5 minutes of illumination.  
304 Although technically challenging, in the future it would be of interest to assess whether  
305 the rise 2-LG can be detected over a much shorter time frame.

306 In further support of the model that 2-LG is the physiologically relevant activator of  
307 the TRPC channels, mutation of *Drosophila inaE*, which encodes a DAG lipase  
308 necessary for the sn-1 hydrolysis for production of 2-MAG from DAG, causes a transient  
309 ERG phenotype that resembles the *trp* mutant (Leung *et al*, 2008). The *inaE* mutant  
310 phenotype indicates that one or more lipid metabolites produced subsequent to light-  
311 dependent production of DAG contributes to TRP channel activation. However, this

312 work did not clarify whether the relevant lipid is 2-LG or some other metabolite such LA.  
313 We suggest that the *inaE* phenotype is not as severe as the *norpA*<sup>P24</sup> null mutant since  
314 the viable *inaE* alleles are hypomorphic (Leung *et al.*, 2008). Several studies found that  
315 LA and other PUFAs can activate the TRPC channels (Chyb *et al.*, 1999; Delgado &  
316 Bacigalupo, 2009; Lev *et al.*, 2012). We also find that LA can activate the TRPC  
317 channels. However, a previous report concludes that PUFAs including LA remain  
318 unchanged upon illumination (Delgado *et al.*, 2014). This is consistent with our lipidomic  
319 analysis indicating that the modest rise in LA in light stimulated animals is not significant.

320 While LEA, phospho-LEA and LinGly are also increased in a light-dependent  
321 manner and are effective at activating the TRPC channels, the findings that the light-  
322 dependent increases are much lower than 2-LG suggests that they are not likely to be  
323 the prime lipids that activate the highly abundant TRP and TRPL channels in  
324 photoreceptor cells. We suggest that the endocannabinoids (LEA and phospho-LEA)  
325 and the NAG (LinGly) do not function primarily in activation of TRP and TRPL, but  
326 rather in some other light-dependent function in photoreceptor cells. One possibility is  
327 that these lipids might regulate synaptic vesicle recycling in photoreceptor cells, since  
328 this dynamic process depends on proper lipid content at the synapse (Marza *et al.*,  
329 2008). Moreover, if flies are fed a diet deficient in PUFA, this causes a deficit in the on-  
330 and off-transient responses in the electroretinogram, which reflects a decrease in signal  
331 transmission from photoreceptor cells to their postsynaptic partners (Ziegler *et al.*, 2015).  
332 Although increases of LEA, phosphor-LEA and LinGly are PLC-dependent, it is unclear  
333 how these lipids are produced in *Drosophila*.

334 Our results indicate that the specific fatty acid conjugate and the degree of  
335 saturation of the fatty acid in the lipid are factors that contribute to activation of TRP and  
336 TRPL. All of the lipids that increased in a light- and NORPA-dependent manner were  
337 conjugated to the PUFA, linoleic acid (C18:2). In contrast the levels of two other 2-  
338 MAGs analyzed that included either a saturated fatty (palmitic acid, C16:0) or a  
339 monounsaturated fatty acid (oleic acid, C18:1) were not increased by light. Moreover,  
340 oleic acid was ineffective at activated TRPL *in vitro* or in increasing Ca<sup>2+</sup> responses in  
341 ommatidia.

342 An open question concerns the mechanism through which 2-LG activates the  
343 channels. We propose that the endocannabinoid, 2-LG, directly activates TRP and  
344 TRPL *in vivo*. In mammals, plant-derived cannabinoids and endocannabinoids bind to  
345 the G-protein coupled receptors CB1 and CB2 (Gregus & Buczynski, 2020). However,  
346 there are no *Drosophila* CB1 or CB2 homologs (McPartland *et al.*, 2001). At least six  
347 mammalian TRP channels are activated *in vitro* by cannabinoids and endocannabinoids,  
348 including four TRPV channels, TRPA1 and TRPM8 (Bradshaw *et al.*, 2013; Muller *et al.*,  
349 2019). An interaction between rat TRPV2 and cannabidiol was recently identified in a  
350 cryo-EM structure (Pumroy *et al.*, 2019) and differences in the putative binding sites  
351 among mammalian TRP channels has been modeled and discussed (Muller *et al.*, 2020;  
352 Muller & Reggio, 2020). Similarly, the *Drosophila* TRPC channels, TRP and TRPL, may  
353 also be receptors for endocannabinoids. Since CB1 and CB2 are not present in  
354 *Drosophila* (McPartland *et al.*, 2001), we suggest that TRP channels comprise a class of  
355 ionotropic cannabinoid receptors conserved from flies to humans.



356 A previous and highly intriguing study proposed that the TRP and TRPL channels  
357 are mechanically-gated following light-induced activation of the phototransduction  
358 cascade and stimulation of NORPA (Hardie & Franze, 2012). Their concept is that  
359 following stimulation of PLC, the DAG that remains in the membrane is smaller than  
360 PIP<sub>2</sub>, thereby resulting in a conformational change in the plasma membrane that causes  
361 mechanical activation of the channels. We suggest the model that allosteric modulation  
362 of TRP and TRPL by 2-LG along with conformational changes in the membrane due to  
363 hydrolysis of PIP<sub>2</sub> both contribute to activation of the TRPC channels. This dual  
364 mechanism would ensure that production of 2-LG alone, or conformation changes of the  
365 membrane alone would be insufficient to activate TRP and TRPL. Since generation of  
366 2-LG or movements in the plasma membrane could in principle occur without  
367 stimulation of PLC, this dual mechanism would reduce the probability of channel  
368 activation independent of light. It has also been posited that mechanical stimulation in  
369 combination with protons produced from PIP<sub>2</sub> hydrolysis could collaborate to promote  
370 TRPC channel activation (Hardie & Franze, 2012). A requirement for two PLC-  
371 dependent changes to activate TRP and TRPL would have the great benefit of  
372 minimizing noise in photoreceptor cells, which is essential for photoreceptor cells to  
373 achieve their exquisite single photon sensitivity.

374

## 375 **Materials and methods**

### 376 **Sources of fly stocks and rearing**

377 *w*<sup>1118</sup> was used as the wild-type control. The following flies were obtained from the  
378 Bloomington Stock Center (stock numbers are indicated): *trp*<sup>343</sup> (#9046), *trpl*<sup>302</sup> (#31433).

379 The following stocks were provided by the indicated investigators:  
380 *cn<sup>1</sup>, trpl<sup>302</sup>, bw<sup>1</sup>; trp<sup>343</sup>, ninaE-GCaMP6f/Tb<sup>1</sup>* (R. Hardie) and *norpA<sup>P24</sup>* (W. Pak), which was  
381 outcrossed to *w<sup>1118</sup>*. The *w<sup>1118</sup>, norpA<sup>P24</sup>* flies were used throughout this work but are  
382 referred to as *norpA<sup>P24</sup>* for brevity. Flies were reared on standard cornmeal-yeast media:  
383 24,900 ml distilled water, 324 g agar (66-103, Genesee scientific), 1,800 g cornmeal  
384 (NC0535320, lab scientific), 449 g yeast (ICN90331280, MP Biomedicals), 240 ml  
385 Tegosept (30% in ethanol; H5501, Sigma Aldrich), 72 ml propionic acid (81910, Sigma  
386 Aldrich), 8.5 ml phosphoric acid (438081, Sigma Aldrich) and 2,400 ml molasses (62-  
387 118, Genesee Scientific). Flies were initially raised in vials or bottles containing the  
388 media at 25°C in a chamber under 12-hour light/12-hour dark cycle and transferred to  
389 24-hour dark conditions before experiments as indicated below.

390

### 391 **Chemicals**

392 The following chemicals were obtained from Cayman Chemical: linoleic acid  
393 (#90150), 2-linoleoyl glycerol (#62260), linoleoyl ethanolamide (#90155), linoleoyl  
394 glycine (#9000326), oleic acid (#9000326), 1-oleoyl-2-acetyl-*sn*-glycerol (OAG, #62600),  
395 2-arachidonoyl glycerol (#62160), 2-arachidonoyl glycerol ether (#62165), R-1  
396 methanandamide (#90070), JZL 184 (#13158) and IDFP (#10215). The chemicals were  
397 dissolved in ethanol or DMSO and kept at -80°C.

398

### 399 **Exposing flies to light and collecting fly heads for lipidomic analyses**

400 Bottles containing flies were transferred to and maintained in the dark for 7 days  
401 after egg laying and handled under a dim red photographic safety light throughout the

402 experiments. ~150 flies (0—4 days old) were collected and transferred into bottles  
403 containing fly food. The bottles were wrapped with aluminum foil and placed in the dark.  
404 After two days, flies were starved in the dark by transferring the flies into bottles  
405 containing 1% agarose, wrapped with aluminum foil and placed in the dark. After 15—  
406 17 hours, the flies were anesthetized with CO<sub>2</sub> and transferred into 50 mL tubes  
407 (352070, BD Falcon). After 1—2 minutes when the flies began to move, we plugged  
408 each tube with a cotton ball, which we pushed down to the 10-mL line. The tubes were  
409 covered with aluminum foil and placed in a rack for 10 minutes to allow the flies to  
410 continue to recover from the CO<sub>2</sub> exposure. After removing the aluminum foil, we left the  
411 cotton ball in each tube and secured the top of each tube with a screw cap. We then  
412 placed the tubes in a 37°C incubator for 3 minutes since PLC activity is higher at 37°C  
413 than at the standard incubation temperature of 25°C (Huang *et al.*, 2004).

414 To enable us to compare lipids that increase upon light exposure, we either  
415 maintained the tubes with the flies in the dark or exposed the flies to blue light from the  
416 side of the tube (~0.3—1.0 mW at the distal and the proximal sides of the tube,  
417 respectively) for 5 minutes. The tubes were immediately immersed in liquid nitrogen for  
418 30 seconds. To mechanically separate the head and bodies, we removed the cotton  
419 plugs, reinserted the screw caps, and vigorously vortexed the tubes. The frozen  
420 samples were then passed through 25 and 40 mesh sieves. The fly heads, which were  
421 trapped on the 40 mesh sieves, were quickly transferred into chilled 1.5 ml black  
422 microfuge tubes (T7100BK, Argos technologies) and stored at -80°C until we performed  
423 the lipid extractions.

424

## 425 **Lipid extraction from fly heads**

426 500  $\mu$ L of methanol was added to each tube containing 4—8 mg of fly heads  
427 followed by 100 pmols, deuterium-labeled *N*-arachidonoyl glycine (d8NAGly), to act as  
428 an internal standard. The tubes were then closed, vortexed for 30 seconds and left in  
429 darkness on ice for 1 hour, vortexed again for 30 seconds and left to process for  
430 another hour in darkness on ice. The samples were then centrifuged at 19,000xg at  
431 24°C for 20 minutes. The supernatants were collected and placed in polypropylene  
432 tubes (15 ml) and 1.5 ml of HPLC-grade water was added making the final  
433 supernatant/water solution 25% organic. A partial purification of lipids was achieved  
434 using a preppy apparatus assembled with 500 mg C18 solid-phase extraction columns.  
435 The columns were conditioned with 5 mL of HPLC-grade methanol immediately  
436 followed by 2.5 mL of HPLC-grade water under pressure. The supernatant/water  
437 solution was then loaded onto the C18 column and washed with 2.5 mL of HPLC grade  
438 water followed by 1.5 mL of 40% methanol. Elutions of 1.5 mL of 60%, 70%, 85% and  
439 100% methanol were collected in individual autosampler vials and then stored in a -  
440 80°C freezer until mass spectrometer analysis.

441

## 442 **LC/MS/MS analysis and quantification**

443 Samples were removed from the -80°C freezer and allowed to warm to room  
444 temperature then vortexed for approximately 1 minute before being placed into the  
445 autosampler and held at 24°C (Agilent 1100 series autosampler, Palo Alto, CA) for the  
446 LC/MS/MS analysis. 20  $\mu$ L of eluants were injected separately to be rapidly separated  
447 using a C18 Zorbax reversed-phase analytical column to scan for individual compounds.

448 Gradient elution (200  $\mu$ L/min) then occurred, under the pressure created by two  
449 Shimadzu 10AdVP pumps (Columbia, MD). Next, electrospray ionization was done  
450 using an Applied Biosystems/MDS SCIEX (Foster City, CA) API3000 triple quadrupole  
451 mass spectrometer. All compounds were analyzed using multiple reaction monitoring  
452 (MRM). Synthetic standards were used to generate optimized MRM methods and  
453 standard curves for analysis. We reported the MRM parent/fragment pairs previously  
454 (Tortoriello *et al*, 2013), with the exception of phosphoLEA, which is MRM[-] 403.5/58.5.  
455 The mobile phases are also the same as we reported previously (Tortoriello *et al*,  
456 2013): mobile phase A, 80% HPLC-grade H<sub>2</sub>O/20% HPLC-grade methanol, 1 mM  
457 ammonium acetate; mobile phase B, 100% HPLC-grade methanol, 1 mM ammonium  
458 acetate.

459

## 460 **Ca<sup>2+</sup> imaging**

461 Schneider 2 (S2) cells carrying a *trpl-egfp* transgene (gift from B. Minke) (Parnas *et*  
462 *al.*, 2007) were grown in 60 mm dishes (353002, Falcon) at 25°C in 4 mL Schneider's  
463 media (21720-024, Gibco) that contained 10% inactivated fetal bovine serum (10437-  
464 028, Gibco) and 50 units/mL penicillin/streptomycin (15140-122, Gibco). S2 cells were  
465 seeded on 8 mm round cover glasses (Matsunami) in a 35 mm dishes (1000-035, Iwaki).  
466 We then added 2  $\mu$ L 500 mM CuSO<sub>4</sub> (039-04412, Wako) to 2 mL culture medium (final  
467 500  $\mu$ M) and incubated the cells for 24 hours in a 25°C incubator to induce expression  
468 of the gene encoding TRPL::EGFP. The cells without the CuSO<sub>4</sub> treatment were used  
469 as the control cells that did not express TRPL. To load the cells with Fura-2 AM, we  
470 added a 1 mL of the following mixture to the culture media and incubated the cells at

471 25°C incubator for 1—3 hours: 5  $\mu$ M Fura-2 AM (F-1201, Life Technologies), 250  $\mu$ M  
472 probenecid (162-26112, Wako), 20% pluronic F-127 (P2443, Sigma). The cells were  
473 then allowed to recover for 15 minutes in a bath solution containing 130 mM NaCl, 5  
474 mM KCl, 2 mM MgCl<sub>2</sub>, 2 mM CaCl<sub>2</sub>, 30 mM sucrose, and 10 mM N-  
475 Tris(hydroxymethyl)methyl-2-aminoethanesulfonic acid (TES), after adjusting the pH to  
476 7.2 with NaOH. The cover glasses were mounted in a chamber (RC-26G; Warner  
477 Instruments) connected to a gravity flow system to deliver various stimuli. A xenon lamp  
478 was used as an illumination source. To obtain fluorescent intensities of Ca<sup>2+</sup>-bound and  
479 Ca<sup>2+</sup>-free Fura-2, we excited the cells at 340 and 380 nm, respectively, and emission  
480 was monitored at 510 nm with a sCMOS camera (Zyla 4.2 Plus; Andor Technology)  
481 used with a fluorescent microscope (Eclipse TE2000-U, Nikon). The data were acquired  
482 using iQ2 software (Andor Technology) and the ratio values (340/380) were calculated  
483 with Fiji software (Schindelin *et al*, 2012).

484 We obtained an average trace for each sample and calculated the change in Ca<sup>2+</sup><sub>i</sub>  
485 as follows: Ca<sup>2+</sup><sub>i</sub> response=(F<sub>res</sub> – F<sub>min</sub>)/(F<sub>max</sub> – F<sub>min</sub>). To normalize the responses, we  
486 subtracted the minimum values during the basal period (F<sub>min</sub>) from the responses every  
487 3 sec (F<sub>res</sub>). We also subtracted the F<sub>min</sub> from the maximum value obtained due to  
488 addition of the ionomycin (F<sub>max</sub>) (I0634, Sigma). After the normalization we extracted the  
489 maximum increase in Ca<sup>2+</sup><sub>i</sub> (Ca<sup>2+</sup><sub>i</sub> max) during the stimulation period for further analysis.  
490 During stimulation with 2-AG ether, we observed non-specific Ca<sup>2+</sup><sub>i</sub> responses, which  
491 we recognized due to stochastic and sudden ratio increases in CuSO<sub>4</sub>-induced (TRPL-  
492 expressing) and non-induced control cells. Traces containing these non-specific  
493 responses were omitted from the analyses.

494

## 495 **Dissociation of ommatidia**

496 All ommatidia were isolated from *norpA*<sup>P24</sup> flies to prevent light-induced activation of  
497 the TRP and TRPL channels. The flies were maintained under standard light/dark  
498 cycles and transferred to a constant darkness after initiating new crosses to eliminate  
499 any possibility of light-induced retinal degeneration. Male progeny were selected for the  
500 experiments with isolated ommatidia because *norpA* is on the X chromosome, thereby  
501 simplifying the crosses needed to obtain flies with the *norpA*<sup>P24</sup> mutation, which is  
502 recessive. The *trpl*<sup>302</sup> (Niemeyer *et al.*, 1996) and *trpl*<sup>343</sup> (Wang *et al.*, 2005a) mutations  
503 are recessive. The control flies were heterozygous for *trpl*<sup>302</sup> and *trpl*<sup>343</sup>  
504 (*norpA*<sup>P24</sup>/Y;*cn*<sup>1</sup>,*trpl*<sup>302</sup>,*bw*<sup>1</sup>/+;*trp*<sup>343</sup>,*ninaE-GCaMP6f*/+) and were obtained by crossing  
505 *norpA*<sup>P24</sup> females and *cn*<sup>1</sup>,*trpl*<sup>302</sup>,*bw*<sup>1</sup>;*trp*<sup>343</sup>,*ninaE-GCaMP6f/Tb*<sup>1</sup> males. The *trp*<sup>343</sup>  
506 mutant was also heterozygous for *trpl*<sup>302</sup> (*norpA*<sup>P24</sup>/Y;*cn*<sup>1</sup>,*trpl*<sup>302</sup>,*bw*<sup>1</sup>/+;*trp*<sup>343</sup>,*ninaE-*  
507 *GCaMP6f/trp*<sup>343</sup>) and was obtained by crossing *norpA*<sup>P24</sup>;+;*trp*<sup>343</sup> females and  
508 *cn*<sup>1</sup>,*trpl*<sup>302</sup>,*bw*<sup>1</sup>;*trp*<sup>343</sup>,*ninaE-GCaMP6f/Tb*<sup>1</sup> males. The *trpl*<sup>302</sup> mutant was also  
509 heterozygous for *trp*<sup>343</sup> (*norpA*<sup>P24</sup>/Y;*cn*<sup>1</sup>,*trpl*<sup>302</sup>,*bw*<sup>1</sup>;*trp*<sup>343</sup>,*ninaE-GCaMP6f*/+) and was  
510 obtained by crossing *norpA*<sup>P24</sup>,*trpl*<sup>302</sup> females and *cn*<sup>1</sup>,*trpl*<sup>302</sup>,*bw*<sup>1</sup>;*trp*<sup>343</sup>,*ninaE-*  
511 *GCaMP6f/Tb*<sup>1</sup> males. The *trpl*<sup>302</sup>;*trp*<sup>343</sup> mutant (*norpA*<sup>P24</sup>/Y;*cn*<sup>1</sup>,*trpl*<sup>302</sup>,*bw*<sup>1</sup>;*trp*<sup>343</sup>,*ninaE-*  
512 *GCaMP6f/trp*<sup>343</sup>) was obtained by crossing *norpA*<sup>P24</sup>,*trpl*<sup>302</sup>,*trp*<sup>343</sup> females and  
513 *cn*<sup>1</sup>,*trpl*<sup>302</sup>,*bw*<sup>1</sup>;*trp*<sup>343</sup>,*ninaE-GCaMP6f/Tb*<sup>1</sup> males.

514 Dissection of ommatidia was performed similar to that described previously (Hardie,  
515 1991). Briefly, we performed dissections under a dim LED light source with a red filter  
516 (RG610, Schott), which is functionally equivalent to darkness for the flies. To conduct

517 each experiment, two males (within 4 hours of eclosion) were collected using CO<sub>2</sub> and  
518 the heads were removed, briefly soaked in 70% ethanol and then immersed in a drop of  
519 dissection media containing Schneider's medium and 0.2% bovine serum albumin (fatty  
520 acid-free, A8806, Sigma). The four eye cups were dissected using forceps and the  
521 retina were scooped out using a micro scooper made from a minutien pin (26002-10,  
522 Fine Science Tools). The retinas were collected using a fire-polished trituration glass  
523 pipette made from a glass capillary (outer diameter 1.2 mm, inner diameter 0.69 mm,  
524 GC120-10, Warner Instruments) and washed with and incubated in fresh dissection  
525 media for 20 minutes in the dark. Surrounding pigmented glia were removed by rapid  
526 aspiration/expiration and the retina were transferred to a drop (30 μL) of the dissection  
527 media. Ommatidia were then mechanically dissociated by repetitive pipetting using  
528 three fire-polished trituration pipettes with different inner diameters until almost all the  
529 ommatidia were isolated from the lamina layers. Dissociated ommatidia were  
530 immediately used for subsequent imaging experiments and maintained in the drop in a  
531 dark for up to 60 minutes.

532

### 533 **GCaMP6 imaging**

534 Each ommatidial suspension (8—9 μL) was placed on the glass bottom of a  
535 chamber (RC-26G; Warner Instruments). Cells were allowed to settle down to the  
536 bottom for 3—4 minutes. To wash out floating cells, the chamber was filled and  
537 perfused with an extracellular solution containing 120 mM NaCl, 5 mM KCl, 4 mM MgCl<sub>2</sub>,  
538 1.5 mM CaCl<sub>2</sub>, 25 mM L-proline, 5 mM L-alanine, and 10 mM TES, which was adjusted  
539 to pH 7.15 with NaOH. The Ca<sup>2+</sup>-free experiments were performed with a solution that



540 was nominally  $\text{Ca}^{2+}$ -free by omitting 1.5 mM  $\text{CaCl}_2$  from the extracellular solution. A  
541 xenon lamp was used as an illumination source.

542 To monitor the fluorescent intensity of the GCaMP6f, the ommatidia were excited  
543 with 472 nm light and emissions were monitored at 520 nm with a sCMOS camera (Zyla  
544 4.2 Plus; Andor Technology) attached to a fluorescent microscope (Eclipse TE2000-U,  
545 Nikon). To minimize photobleaching of GCaMP6f and an exhaustion of cells caused by  
546 light activation of the rhodopsins, we excited the ommatidia every 6 seconds for 60  
547 milliseconds. Ionomycin (5  $\mu\text{M}$ ) was applied in the end of protocol to evaluate the  
548 viability of ommatidia.

549 Data were acquired with iQ2 software (Andor Technology) and the fluorescent  
550 intensities were calculated with Fiji software (Schindelin *et al.*, 2012). A region of  
551 interest (ROI) was defined as the distal half (the outer side) of the ommatidia since  $\text{Ca}^{2+}_i$   
552 responses were relatively higher in this region (Fig 5A and B) and the proximal half (the  
553 inner side) of ommatidia was prone to vibration during the perfusion. Typically, 15—30  
554 ommatidia in a field was chosen for analysis and cells with obvious damage or small  
555 responses to ionomycin or were out of focus were omitted from the analysis. Changes  
556 in fluorescence intensity ( $\Delta F/F_0$ ) was used to assess the  $\text{Ca}^{2+}_i$  responses [ $(F_t -$   
557  $F_{\text{basal}})/F_{\text{basal}}$ ].  $F_t$  corresponds to the value obtained every 6 seconds.  $F_{\text{basal}}$  is the average  
558 during the first 1 minute (0.1% EtOH alone) in every ommatidium. The background  
559 values were measured in *norpA*<sup>P24</sup> ommatidia that do not express GCaMP6f in the  
560 presence of 0.1% EtOH. The average background values were subtracted from the  
561 fluorescent intensities in all samples. The maximum response ( $\max \Delta F/F_0$ ) with each  
562 lipid (in 0.1% EtOH) was obtained during the 4-minute stimulation period (60—300

563 seconds) after addition of the lipids. The areas under the curve during the stimulation  
564 period (60—300 seconds after addition of the lipids) were calculated using a trapezoidal  
565 rule  $[(F_t + F_{t+1})/2 \times 6 \text{ (sampling interval)}]$ . For no or low responding ommatidia, the  
566 number of cells having  $\max \Delta F/F_0 \leq 0.2$  were counted and divided by the total number of  
567 cells in each sample to obtain the proportion.

568

### 569 **Quantification and statistical analysis**

570 The data are represented as means  $\pm$  SEM. The number of repeated times for each  
571 experiment (n) is indicated in the figure legends. We used the unpaired, two-tailed  
572 Student's *t*-test to determine the statistical significance of two samples that had equal  
573 variance. In experiments in which we compared two sets of data that did not have equal  
574 variance, we used Welch's *t*-test. To determine the statistical significance of the data  
575 using ommatidia in  $\text{Ca}^{2+}$ -free versus  $\text{Ca}^{2+}$ -containing bath conditions, we used the  
576 paired, two-tailed Student's *t*-test. To evaluate the statistical significance of multiple  
577 samples, we used one-way ANOVA with Dunnett's *post hoc* analysis. To evaluate the  
578 statistical significance of multiple samples in the no or low response population, we  
579 used one-way ANOVA with Tukey's *post hoc* analysis. Statistical tests were performed  
580 using Prism 7 (Graphpad). Asterisks indicate statistical significance, where \**p* < 0.05,  
581 \*\**p* < 0.01, \*\*\**p* < 0.001 and \*\*\*\**p* < 0.0001.

582

### 583 **Data Availability**

584 No data that requires deposition in a public database.

585

## 586 **Acknowledgments**

587 This work was supported by a grant to C.M. from the National Eye Institute  
588 (EY010852), a grant to H.B. from the National Institute on Drug Addiction (DA039463),  
589 a grant to M.T. from a Grant-in-Aid for Scientific Research from the Ministry of  
590 Education, Culture, Sports, Science and Technology in Japan (#15H02501), and grants  
591 to T.S. from a Grant-in-Aid for Scientific Research from the Ministry of Education,  
592 Culture, Sports, Science and Technology in Japan (#17H07337 and #18K06495). We  
593 thank Dr. Baruch Minke (Hebrew University) for sharing the *trpl*-expressing stable S2  
594 cells, and Dr. Roger Hardie (Cambridge University) for sharing valuable fly stocks and  
595 suggestions for the ommatidia dissociation protocol.

596

## 597 **Author Contributions**

598 Conceptualization, T.S. and C.M.; Methodology, T.S., H.B.B., E.L., and C.M.;  
599 Investigation, T.S., H.B.B., and E.L.; Formal Analysis, T.S., H.B.B., and E.L.; Writing —  
600 Original Draft, T.S. and C.M.; Writing — Review and Editing, T.S., H.B.B., M.T., and  
601 C.M.; Funding Acquisition, T.S., H.B.B., M.T., and C.M.; Supervision, T.S. and C.M.

602

## 603 **Declaration of Interests**

604 The authors declare that they have no conflict of interest.

605

606

## 607 **References**

- 608 Abadji V, Lin S, Taha G, Griffin G, Stevenson LA, Pertwee RG, Makriyannis A (1994)  
609 (R)-methanandamide: a chiral novel anandamide possessing higher potency and  
610 metabolic stability. *J Med Chem* 37: 1889-1893
- 611 Acharya JK, Jalink K, Hardy RW, Hartenstein V, Zuker CS (1997) InsP<sub>3</sub> receptor  
612 essential for growth and differentiation but not for vision in *Drosophila*. *Neuron* 18:  
613 881-887
- 614 Asteriti S, Liu CH, Hardie RC (2017) Calcium signalling in *Drosophila* photoreceptors  
615 measured with GCaMP6f. *Cell Calcium* 65: 40-51
- 616 Bloomquist BT, Shortridge RD, Schneuwly S, Perdeu M, Montell C, Steller H, Rubin G,  
617 Pak WL (1988) Isolation of a putative phospholipase C gene of *Drosophila*, *norpA*,  
618 and its role in phototransduction. *Cell* 54: 723-733
- 619 Bradshaw HB, Raboune S, Hollis JL (2013) Opportunistic activation of TRP receptors  
620 by endogenous lipids: exploiting lipidomics to understand TRP receptor cellular  
621 communication. *Life Sci* 92: 404-409
- 622 Bradshaw HB, Rimmerman N, Hu SS, Benton VM, Stuart JM, Masuda K, Cravatt BF,  
623 O'Dell DK, Walker JM (2009) The endocannabinoid anandamide is a precursor for  
624 the signaling lipid N-arachidonoyl glycine by two distinct pathways. *BMC Biochem*  
625 10: 14
- 626 Britt SG, Feiler R, Kirschfeld K, Zuker CS (1993) Spectral tuning of rhodopsin and  
627 metarhodopsin in vivo. *Neuron* 11: 29-39
- 628 Chyb S, Raghu P, Hardie RC (1999) Polyunsaturated fatty acids activate the *Drosophila*  
629 light-sensitive channels TRP and TRPL. *Nature* 397: 255-259

- 630 Delgado R, Bacigalupo J (2009) Unitary recordings of TRP and TRPL channels from  
631 isolated *Drosophila* retinal photoreceptor rhabdomeres: activation by light and lipids.  
632 *J Neurophysiol* 101: 2372-2379
- 633 Delgado R, Delgado MG, Bastin-Héline L, Glavic A, O'Day PM, Bacigalupo J (2019)  
634 Light-induced opening of the TRP channel in isolated membrane patches excised  
635 from photosensitive microvilli from *Drosophila* photoreceptors. *Neuroscience* 396:  
636 66-72
- 637 Delgado R, Muñoz Y, Peña-Cortés H, Giavalisco P, Bacigalupo J (2014) Diacylglycerol  
638 activates the light-dependent channel TRP in the photosensitive microvilli of  
639 *Drosophila melanogaster* photoreceptors. *J Neurosci* 34: 6679-6686
- 640 Elinder F, Liin SI (2017) Actions and mechanisms of polyunsaturated fatty acids on  
641 voltage-gated ion channels. *Front Physiol* 8: 43
- 642 Gregus AM, Buczynski MW (2020) Druggable targets in endocannabinoid signaling.  
643 *Advances in experimental medicine and biology* 1274: 177-201
- 644 Hardie RC (1991) Whole-cell recordings of the light-induced current in dissociated  
645 *Drosophila* photoreceptors - evidence for feedback by calcium permeating the light-  
646 sensitive channels. *Proc Roy Soc Lond B Biol Sci* 245: 203-210
- 647 Hardie RC, Franze K (2012) Photomechanical responses in *Drosophila* photoreceptors.  
648 *Science* 338: 260-263
- 649 Hardie RC, Juusola M (2015) Phototransduction in *Drosophila*. *Curr Opin Neurobiol*  
650 34C: 37-45
- 651 Hardie RC, Minke B (1992) The *trp* gene is essential for a light-activated Ca<sup>2+</sup> channel  
652 in *Drosophila* photoreceptors. *Neuron* 8: 643-651

- 653 Huang FD, Matthies HJ, Speese SD, Smith MA, Broadie K (2004) Rolling blackout, a  
654 newly identified PIP<sub>2</sub>-DAG pathway lipase required for *Drosophila* phototransduction.  
655 *Nat Neurosci* 7: 1070-1078
- 656 Huang J, Liu CH, Hughes SA, Postma M, Schwiening CJ, Hardie RC (2010) Activation  
657 of TRP channels by protons and phosphoinositide depletion in *Drosophila*  
658 photoreceptors. *Curr Biol* 20: 189-197
- 659 Inoue H, Yoshioka T, Hotta Y (1985) A genetic study of inositol trisphosphate  
660 involvement in phototransduction using *Drosophila* mutants. *Biochem Biophys Res*  
661 *Commun* 132: 513-519
- 662 Laine K, Jarvinen K, Mechoulam R, Breuer A, Jarvinen T (2002) Comparison of the  
663 enzymatic stability and intraocular pressure effects of 2-arachidonylglycerol and  
664 noladin ether, a novel putative endocannabinoid. *Invest Ophthalmol Vis Sci* 43:  
665 3216-3222
- 666 Leung HT, Tseng-Crank J, Kim E, Mahapatra C, Shino S, Zhou Y, An L, Doerge RW,  
667 Pak WL (2008) DAG lipase activity is necessary for TRP channel regulation in  
668 *Drosophila* photoreceptors. *Neuron* 58: 884–896
- 669 Lev S, Katz B, Tzarfaty V, Minke B (2012) Signal-dependent hydrolysis of  
670 phosphatidylinositol 4,5-bisphosphate without activation of phospholipase C:  
671 Implications on gating of *Drosophila* TRPL (Transient Receptor Potential-Like)  
672 channel. *J Biol Chem* 287: 1436–1447
- 673 Lin G, Lee PT, Chen K, Mao D, Tan KL, Zuo Z, Lin WW, Wang L, Bellen HJ (2018)  
674 Phospholipase *PLA2G6*, a Parkinsonism-associated gene, affects Vps26 and Vps35,

675       retromer function, and ceramide levels, similar to  $\alpha$ -synuclein gain *Cell Metab* 28:  
676       605-618 e606

677   Liu J, Wang L, Harvey-White J, Osei-Hyiaman D, Razdan R, Gong Q, Chan AC, Zhou Z,  
678       Huang BX, Kim HY *et al* (2006) A biosynthetic pathway for anandamide. *Proc Natl*  
679       *Acad Sci USA* 103: 13345-13350

680   Liu L, MacKenzie KR, Putluri N, Maletic-Savatic M, Bellen HJ (2017) The glia-neuron  
681       lactate shuttle and elevated ROS promote lipid synthesis in neurons and lipid droplet  
682       accumulation in glia via APOE/D. *Cell Metab* 26: 719-737 e716

683   Long JZ, Li W, Booker L, Burston JJ, Kinsey SG, Schlosburg JE, Pavon FJ, Serrano AM,  
684       Selley DE, Parsons LH *et al* (2009) Selective blockade of 2-arachidonoylglycerol  
685       hydrolysis produces cannabinoid behavioral effects. *Nat Chem Biol* 5: 37-44

686   Marza E, Long T, Saiardi A, Sumakovic M, Eimer S, Hall DH, Lesa GM (2008)  
687       Polyunsaturated fatty acids influence synaptojanin localization to regulate synaptic  
688       vesicle recycling. *Mol Biol Cell* 19: 833-842

689   McGurk L, Berson A, Bonini NM (2015) *Drosophila* as an *in vivo* model for human  
690       neurodegenerative disease. *Genetics* 201: 377-402

691   McPartland J, Di Marzo V, De Petrocellis L, Mercer A, Glass M (2001) Cannabinoid  
692       receptors are absent in insects. *J Comp Neurol* 436: 423-429

693   Minke B (1982) Light-induced reduction in excitation efficiency in the *trp* mutant of  
694       *Drosophila*. *J Gen Physiol* 79: 361-385

695   Minke B, Wu C, Pak WL (1975) Induction of photoreceptor voltage noise in the dark in  
696       *Drosophila* mutant. *Nature* 258: 84-87

697   Montell C (2012) *Drosophila* visual transduction. *Trends Neurosci* 35: 356-363

- 698 Montell C (2021) *Drosophila* sensory receptors—a set of molecular Swiss Army Knives.  
699 *Genetics* 217: 1-34
- 700 Montell C, Rubin GM (1989) Molecular characterization of the *Drosophila trp* locus: a  
701 putative integral membrane protein required for phototransduction. *Neuron* 2: 1313-  
702 1323
- 703 Muller C, Lynch DL, Hurst DP, Reggio PH (2020) A closer look at anandamide  
704 interaction with TRPV1. *Front Mol Biosci* 7: 144
- 705 Muller C, Morales P, Reggio PH (2019) Cannabinoid ligands targeting TRP channels.  
706 *Front Mol Neurosci* 11: 487
- 707 Muller C, Reggio PH (2020) An analysis of the putative CBD binding site in the  
708 ionotropic cannabinoid receptors. *Front Cell Neurosci* 14: 615811
- 709 Niemeyer BA, Suzuki E, Scott K, Jalink K, Zuker CS (1996) The *Drosophila* light-  
710 activated conductance is composed of the two channels TRP and TRPL. *Cell* 85:  
711 651-659
- 712 Nomura DK, Blankman JL, Simon GM, Fujioka K, Issa RS, Ward AM, Cravatt BF,  
713 Casida JE (2008) Activation of the endocannabinoid system by organophosphorus  
714 nerve agents. *Nat Chem Biol* 4: 373-378
- 715 Pak WL (1994) Retinal degeneration mutants of *Drosophila*. In: *Molecular genetics of*  
716 *inherited eye disorders*, Wright A.F., Jay B. (eds.) pp. 29-52. Harwood Academic  
717 Publishers: Chur, Switzerland
- 718 Pak WL, Grossfield J, Arnold KS (1970) Mutants of the visual pathway of *Drosophila*  
719 *melanogaster*. *Nature* 227: 518-520



- 720 Parnas M, Katz B, Minke B (2007) Open channel block by  $\text{Ca}^{2+}$  underlies the voltage  
721 dependence of *Drosophila* TRPL channel. *J Gen Physiol* 129: 17-28
- 722 Phillips AM, Bull A, Kelly LE (1992) Identification of a *Drosophila* gene encoding a  
723 calmodulin-binding protein with homology to the *trp* phototransduction gene. *Neuron*  
724 8: 631-642
- 725 Pumroy RA, Samanta A, Liu Y, Hughes TE, Zhao S, Yudin Y, Rohacs T, Han S,  
726 Moiseenkova-Bell VY (2019) Molecular mechanism of TRPV2 channel modulation  
727 by cannabidiol. *eLife* 8
- 728 Raghu P, Hardie RC (2009) Regulation of *Drosophila* TRPC channels by lipid  
729 messengers. *Cell Calcium* 45: 566-573
- 730 Raghu P, Usher K, Jonas S, Chyb S, Polyakovskiy A, Hardie RC (2000) Constitutive  
731 activity of the light-sensitive channels TRP and TRPL in the *Drosophila*  
732 diacylglycerol kinase mutant, *rdgA*. *Neuron* 26: 169-179
- 733 Ranganathan R, Harris GL, Stevens CF, Zuker CS (1991) A *Drosophila* mutant  
734 defective in extracellular calcium-dependent photoreceptor deactivation and  
735 desensitization. *Nature* 354: 230-232
- 736 Schindelin J, Arganda-Carreras I, Frise E, Kaynig V, Longair M, Pietzsch T, Preibisch S,  
737 Rueden C, Saalfeld S, Schmid B *et al* (2012) Fiji: an open-source platform for  
738 biological-image analysis. *Nat Methods* 9: 676-682
- 739 Shen LR, Lai CQ, Feng X, Parnell LD, Wan JB, Wang JD, Li D, Ordovas JM, Kang JX  
740 (2010) *Drosophila* lacks C20 and C22 PUFAs. *J Lipid Res* 51: 2985-2992
- 741 Tortoriello G, Beiersdorf J, Romani S, Williams G, Cameron GA, Mackie K, Williams MJ,  
742 Di Marzo V, Keimpema E, Doherty P *et al* (2021) Genetic manipulation of sn-1-

743 diacylglycerol lipase and CB<sub>1</sub> cannabinoid receptor gain-of-function uncover  
744 neuronal 2-linoleoyl glycerol signaling in *Drosophila melanogaster*. *Cannabis*  
745 *Cannabinoid Res* 6: 119-136.

746 Tortoriello G, Rhodes BP, Takacs SM, Stuart JM, Basnet A, Raboune S, Widlanski TS,  
747 Doherty P, Harkany T, Bradshaw HB (2013) Targeted lipidomics in *Drosophila*  
748 *melanogaster* identifies novel 2-monoacylglycerols and *N*-acyl amides. *PLoS One* 8:  
749 e67865

750 Wang T, Jiao Y, Montell C (2005a) Dissecting independent channel and scaffolding  
751 roles of the *Drosophila* transient receptor potential channel. *J Cell Biol* 171: 685-694

752 Wang T, Xu H, Oberwinkler J, Gu Y, Hardie RC, Montell C (2005b) Light activation,  
753 adaptation, and cell survival functions of the Na<sup>+</sup>/Ca<sup>2+</sup> exchanger CalX. *Neuron* 45:  
754 367-378

755 Warrick JM, Paulson HL, Gray-Board GL, Bui QT, Fischbeck KH, Pittman RN, Bonini  
756 NM (1998) Expanded polyglutamine protein forms nuclear inclusions and causes  
757 neural degeneration in *Drosophila*. *Cell* 93: 939-949

758 Wes PD, Chevesich J, Jeromin A, Rosenberg C, Stetten G, Montell C (1995) TRPC1, a  
759 human homolog of a *Drosophila* store-operated channel. *Proc Natl Acad Sci USA*  
760 92: 9652-9656

761 Yau KW, Hardie RC (2009) Phototransduction motifs and variations. *Cell* 139: 246-264

762 Yoshioka T, Inoue H, Kasama T, Seyama Y, Nakashima S, Nozawa Y, Hotta Y (1985)  
763 Evidence that arachidonic acid is deficient in phosphatidylinositol of *Drosophila*  
764 heads. *J Biochem* 98: 657-662

765 Zhu X, Chu PB, Peyton M, Birnbaumer L (1995) Molecular cloning of a widely  
766 expressed human homologue for the *Drosophila trp* gene. *FEBS Lett* 373: 193-198  
767 Zhuang N, Li L, Chen S, Wang T (2016) PINK1-dependent phosphorylation of PINK1  
768 and Parkin is essential for mitochondrial quality control. *Cell Death Dis* 7: e2501  
769 Ziegler AB, Menage C, Gregoire S, Garcia T, Ferveur JF, Bretillon L, Grosjean Y (2015)  
770 Lack of dietary polyunsaturated fatty acids causes synapse dysfunction in the  
771 *Drosophila* visual system. *PLoS One* 10: e0135353

772

## 773 **Figure legends**

774 **Figure 1.** Relative lipid levels in control ( $w^{1118}$ ) and  $norpA^{P24}$  (in a  $w^{1118}$  background)  
775 heads from flies maintained in the dark and after light exposure.

776 **A** Schematic of protocol for collecting heads from flies maintained at 37°C in the dark  
777 for 8 minutes or from flies kept in the dark for 3 minutes and then exposed to blue light  
778 for 5 minutes. “Dark” is shorthand for flies that were processed using a dim  
779 photographic safety light right before the 37°C incubation, which is functionally dark to  
780 *Drosophila*. After freezing in liquid N<sub>2</sub>, and vortexing, the heads were collected over a  
781 sieve, lipids were extracted and analyzed by LC/MS/MS.

782 **B** Pathway for production of endocannabinoids and other lipids from  
783 phosphatidylinositol 4,5-bisphosphate [PI(4,5)P<sub>2</sub>]. DAG, diacylglycerol; 2-LG, 2-linoleoyl  
784 glycerol; 2-MAG, 2-monoacylglycerol; LA, linoleic acid. The structures of PI(4,5)P<sub>2</sub> and  
785 DAG are shown.

786 **C—G** Concentrations (nmoles/gram) of the indicated lipids extracted from control and  
787  $norpA^{P24}$  heads that were kept in the dark or exposed to light. All of the lipid metabolites

788 were analyzed from the same set of samples. **(B)** 2-linoleoyl glycerol (2-LG). **(C)**  
789 Linoleoyl ethanolamide (LEA). **(D)** Phospho-linoleoyl ethanolamide (phospho-LEA). **(E)**  
790 Linoleoyl glycine (LinGly). **(F)** Linoleic acid (LA, C18:2).

791 **Data information:** In **(C—G)**, data are presented as mean  $\pm$  SEM (n=12). \*p < 0.05, \*\*p  
792 < 0.01 (unpaired Student's *t*-test).

793

794 **Figure 2.** Effects of endocannabinoids and *N*-acyl glycine on TRPL-dependent  
795 changes in Fura-2 ratio in S2 cells.

796 **A** Comparison of the maximum increase in intracellular  $\text{Ca}^{2+}$  ( $\text{Ca}^{2+}_i$ ) in response to the  
797 indicated lipids. Lipids were added at 100  $\mu\text{M}$ , except for 300  $\mu\text{M}$  oleic acid (OA). The  
798  $\text{Cu}^{2+}$  (-) cells did not express TRPL and the  $\text{Cu}^{2+}$  (+) cells expressed TRPL.

799 **B—F** Fura-2 responses of TRPL-expressing cells to the indicated lipids. The red and  
800 black bars **(B, C, E and F)** indicate the perfusion of the lipids and the ionomycin (Iono),  
801 respectively. **(B)** Dose responses to 2-LG. Values were normalized to Iono. **(C)**  
802 Representative traces to 100  $\mu\text{M}$  2-LG. **(D)** Dose-dependent responses to 2-LG, LEA,  
803 LinGly and LA. The data are the maximum  $\text{Ca}^{2+}_i$  during the stimulation period (60—360  
804 seconds after addition of the lipids). The basal values were subtracted and the  
805 percentages were normalized to the maximum values obtained with 5  $\mu\text{M}$  Iono. The  
806 curves were fitted using nonlinear regression with variable slopes. **(E)** Representative  
807 traces in response to 100  $\mu\text{M}$  LEA. **(F)** Representative traces in response to 100  $\mu\text{M}$   
808 LinGly.

809 **Data information:** In (**A**), data are presented as mean  $\pm$  SEM (n=3—6 experiments;  
810 ~100 cells/experiment). In (**D**), data are presented as mean  $\pm$  SEM (n=5—7; ~100  
811 cells/experiment).

812

813 **Figure 3.** Effects of lipase inhibitors and activation profile of endocannabinoid analogs  
814 on Fura-2 responses in TRPL-expressing S2 cells.

815 **A** Testing effects of a monoacyl glycerol lipase (MAGL) inhibitor (JZL 184, 80 nM) and a  
816 MAGL/fatty acid amide hydrolase inhibitor (IDFP, 30 nM) on  $Ca^{2+}_i$  by 2-LG (10  $\mu$ M), LEA  
817 (10  $\mu$ M) and LinGly (10  $\mu$ M). The cells were pretreated with the inhibitors or the vehicle  
818 (0.1% dimethyl sulfoxide) one minute prior to the lipid application. The background  $Ca^{2+}_i$   
819 were obtained in non-induced  $Cu^{2+}$  (-) cells with the vehicle alone, 80 nM JZL 184 or 30  
820 nM IDFP.

821 **B—D** Responses of Fura-2 to 100  $\mu$ M of the indicated lipids. The red bars indicate the  
822 stimulation period of the lipids.

823 **E—G** Testing for synergistic or additive effects by mixing combinations of 2-LG, LEA,  
824 LinGly and linoleic acid (LA) to TRPL-expressing cells. The numbers indicate the  
825 concentration of lipids ( $\mu$ M).

826 **Data information:** In (**A**), data are presented as mean  $\pm$  SEM (n=3 for TRPL-  
827 expressing cells, n=4—5 for background. ~100 cells/experiment). In (**B—D**), 3 biological  
828 repeats were performed (40—50 cells/experiment) for each stimulation. In (**E—G**), data  
829 are presented as mean  $\pm$  SEM (n=3—4; ~100 cells/experiment).

830

831 **Figure 4.** Monitoring responses of photoreceptor cells stimulated with  
832 endocannabinoids and N-acyl glycine with GCaMP6f.

833 **A, B** Representative GCaMP6f responses to 2-LG in control ommatidia (*norpA<sup>P24</sup>*) and  
834 in *norpA<sup>P24</sup>;trpl<sup>302</sup>;trp<sup>343</sup>* ommatidia. The ommatidia were stimulated with 30  $\mu$ M 2-LG,  
835 followed by 5  $\mu$ M ionomycin (Iono) to confirm the responsiveness of the GCaMP6f in the  
836 photoreceptor cells. The changes in fluorescence are shown in pseudo colors (0-255).  
837 The dotted lines in the images of the basal conditions (before addition of 2-LG) outline  
838 individual rhabdomeres. The 2-LG images were obtained at the 300 seconds time  
839 points in **C and D**. Scale bars, 20  $\mu$ m.

840 **C—F** Traces showing representative  $Ca^{2+}_i$  responses ( $\Delta F/F_0$ ) in photoreceptor cells  
841 from the indicated flies. The red and black bars indicate application of 30  $\mu$ M 2-LG (60—  
842 300 seconds) and 5  $\mu$ M ionomycin (after 300 seconds), respectively. **(C)** Control  
843 (*norpA<sup>P24</sup>*). **(D)** *norpA<sup>P24</sup>;trpl<sup>302</sup>;trp<sup>343</sup>*. **(E)** *norpA<sup>P24</sup>;+;trp<sup>343</sup>*. **(F)** *norpA<sup>P24</sup>;trpl<sup>302</sup>;+*.

844 **G**  $\Delta F/F_0$  indicates the maximum  $Ca^{2+}_i$  responses during the stimulation period (4  
845 minutes: 60—300 seconds in **C—F**) divided by the basal fluorescence levels.

846 **H** Quantification of area under curve during the stimulation period (4 minutes: 60—300  
847 seconds in **C—F**).

848 **I** Proportion of no or low responding photoreceptor cells ( $\max \Delta F/F_0 \leq 0.2$ ) during the  
849 stimulation period (4 minutes: 60—300 seconds in **C—F**).

850 **J** 2-LG stimulated  $Ca^{2+}$  influx rather than  $Ca^{2+}$  release from internal stores in isolated  
851 ommatidia. The blue bars near the top indicate the bath that contained 1.5 mM  $Ca^{2+}$ .  
852 The white bar indicates the bath with no addition of  $Ca^{2+}$ . The red and black bars  
853 indicate application of 30  $\mu$ M 2-LG and 5  $\mu$ M ionomycin, respectively. The dotted and

854 solid orange lines indicate  $\Delta F/F_0$  in a  $\text{Ca}^{2+}$ -containing bath in the absence (dotted) and  
855 presence (solid) of 2-LG. The dotted and solid green lines indicate  $\Delta F/F_0$  in a bath  
856 without added  $\text{Ca}^{2+}$  in the absence (dotted) and presence (solid) of 2-LG.

857 **K** Quantification of the maximum  $\text{Ca}^{2+}_i$  responses to 30  $\mu\text{M}$  2-LG in the absence (-) or  
858 the presence (+) of 1.5 mM extracellular  $\text{Ca}^{2+}$ .  $\Delta F/F_0$  in each  $\text{Ca}^{2+}$  condition was  
859 calculated using values in the periods indicated by green and orange dotted and solid  
860 lines in **(J)**.

861 **L, M** GCaMP6f responses of control (*norpA<sup>P24</sup>*) and *norpA<sup>P24</sup>;trpl<sup>302</sup>;trp<sup>343</sup>* photoreceptor  
862 cells to 100  $\mu\text{M}$  LEA or 30  $\mu\text{M}$  LinGly as indicated. The maximum  $\text{Ca}^{2+}_i$  responses  
863 during the stimulation period (4 minutes) were used for the calculations.

864 **N** GCaMP6f responses of control (*norpA<sup>P24</sup>*) photoreceptor cells to 30  $\mu\text{M}$  oleic acid  
865 (OA) and 30  $\mu\text{M}$  linoleic acid (LA) as indicated. The maximum  $\text{Ca}^{2+}_i$  responses during  
866 the stimulation period (4 minutes) were used for the calculations.

867 **Data information:** In **(G, H)**, data are presented as mean  $\pm$  SEM. n=9—11  
868 experiments; 13—30 ommatidia/experiment. \*p < 0.05. One-way ANOVA with Dunnett's  
869 *post hoc* analysis. In **(I)**, the data are presented as mean  $\pm$  SEM. n=9—11 experiments;  
870 13—30 ommatidia/experiment. \*\*p < 0.01, \*\*\*\*p < 0.0001. One-way ANOVA with  
871 Tukey's *post hoc* analysis. In **(K)**, the data are presented as mean  $\pm$  SEM. n=8. 13—30  
872 ommatidia/experiment. \*\*\*\*p < 0.0001. Paired Student's *t*-test. In **(L, M)**, the data are  
873 presented as mean  $\pm$  SEM. n=9—11. 13—30 ommatidia/experiment. \*p < 0.05, \*\*\*p <  
874 0.001. Unpaired Student's *t*-test. In **(N)**, the data are presented as mean  $\pm$  SEM. n=10—  
875 11. 14—30 ommatidia/experiment.

876

877 **Expanded View Figure legends**

878 **Figure EV1.** Relative lipid levels in control ( $w^{1118}$ ) and  $norpA^{P24}$  (in a  $w^{1118}$  background)  
879 heads from flies maintained in the dark and after light exposure.

880 **A—I** All these lipid metabolites were measured (nmoles/gram) in the same set of  
881 samples used in *Figure 1*. **(A)** 2-palmitoyl glycerol (2-PG). **(B)** 2-oleoyl glycerol (2-OG).  
882 **(C)** Stearoyl ethanolamide (S-EA). **(D)** Palmitoyl ethanolamide (P-EA). **(E)** Oleoyl  
883 ethanolamide (O-EA). **(F)** Oleic acid (OA). **(G)** Stearoyl glycine (S-Gly). **(H)** Palmitoyl  
884 glycine (P-Gly). **(I)** Oleoyl glycine (O-Gly).

885 **Data information:** Data are presented as mean  $\pm$  SEM. n=12. Unpaired Student's *t*-  
886 tests.

887

888 **Figure EV2.** Effects of linoleoyl-conjugates and linoleic acid on S2 cells in which *trpl*  
889 was not induced [ $\text{Cu}^{2+}$  (-), **(A—C and G)**] or *trpl* was induced with  $\text{Cu}^{2+}$  **(D—F)**.  
890 The cells were loaded with Fura-2 AM and each lipid (100  $\mu\text{M}$  or 300  $\mu\text{M}$ ) was applied  
891 exogenously by perfusion. Ionomycin (Iono; 5  $\mu\text{M}$ ) was used to confirm cell viability. The  
892 cells were excited at 340 nm and 380 nm to obtain the Fura-2 ratio. The red and black  
893 bars indicate the addition of the lipids or Iono, respectively. **(A)** 2-LG,  $\text{Cu}^{2+}$  (-). **(B)** LEA,  
894  $\text{Cu}^{2+}$  (-). **(C)** LinGly,  $\text{Cu}^{2+}$  (-). **(D)** OAG,  $\text{Cu}^{2+}$  (+). **(E)** OA,  $\text{Cu}^{2+}$  (+). **(F)** LA,  $\text{Cu}^{2+}$  (+). **(G)**  
895 LA,  $\text{Cu}^{2+}$  (-).

896 **Data information:** 3 or more independent assays were performed for each stimulation  
897 (~100 cells/experiment).

898



899 **Figure EV3.** Effects of endocannabinoid analogs on S2 cells in which *trpl* was not  
900 induced [ $\text{Cu}^{2+}$  (-)].

901 The red bars indicate the addition of 100  $\mu\text{M}$  of the indicated lipids by perfusion. The  
902 cells were excited at 340 nm and 380 nm to obtain the Fura-2 ratio. **(A)** 2-arachidonoyl  
903 glycerol (2-AG). **(B)** 2-AG ether. **(C)** Methanandamide.

904 **Data information:** 3 or more independent assays were performed for each stimulation  
905 (~40 cells/experiment).

906

907 **Figure EV4.** GCaMP6f responses of photoreceptor cells in isolated ommatidia before  
908 (basal) and after addition of 30  $\mu\text{M}$  2-linoleoyl glycerol (2-LG). The ommatidia were

909 isolated from *ninaE>GCaMP6f* flies. Scale bars, 100  $\mu\text{m}$ . **(A)** Control (*norpA<sup>P24</sup>*)

910 ommatidia before addition of 2-LG. **(B)** Control ommatidia ~240 seconds after addition

911 of 2-LG. **(C)** *norpA<sup>P24</sup>;trpl<sup>302</sup>;trp<sup>343</sup>* ommatidia before addition of 2-LG. **(D)**

912 *norpA<sup>P24</sup>;trpl<sup>302</sup>;trp<sup>343</sup>* ommatidia ~240 seconds after addition of 2-LG.

# Figure 1

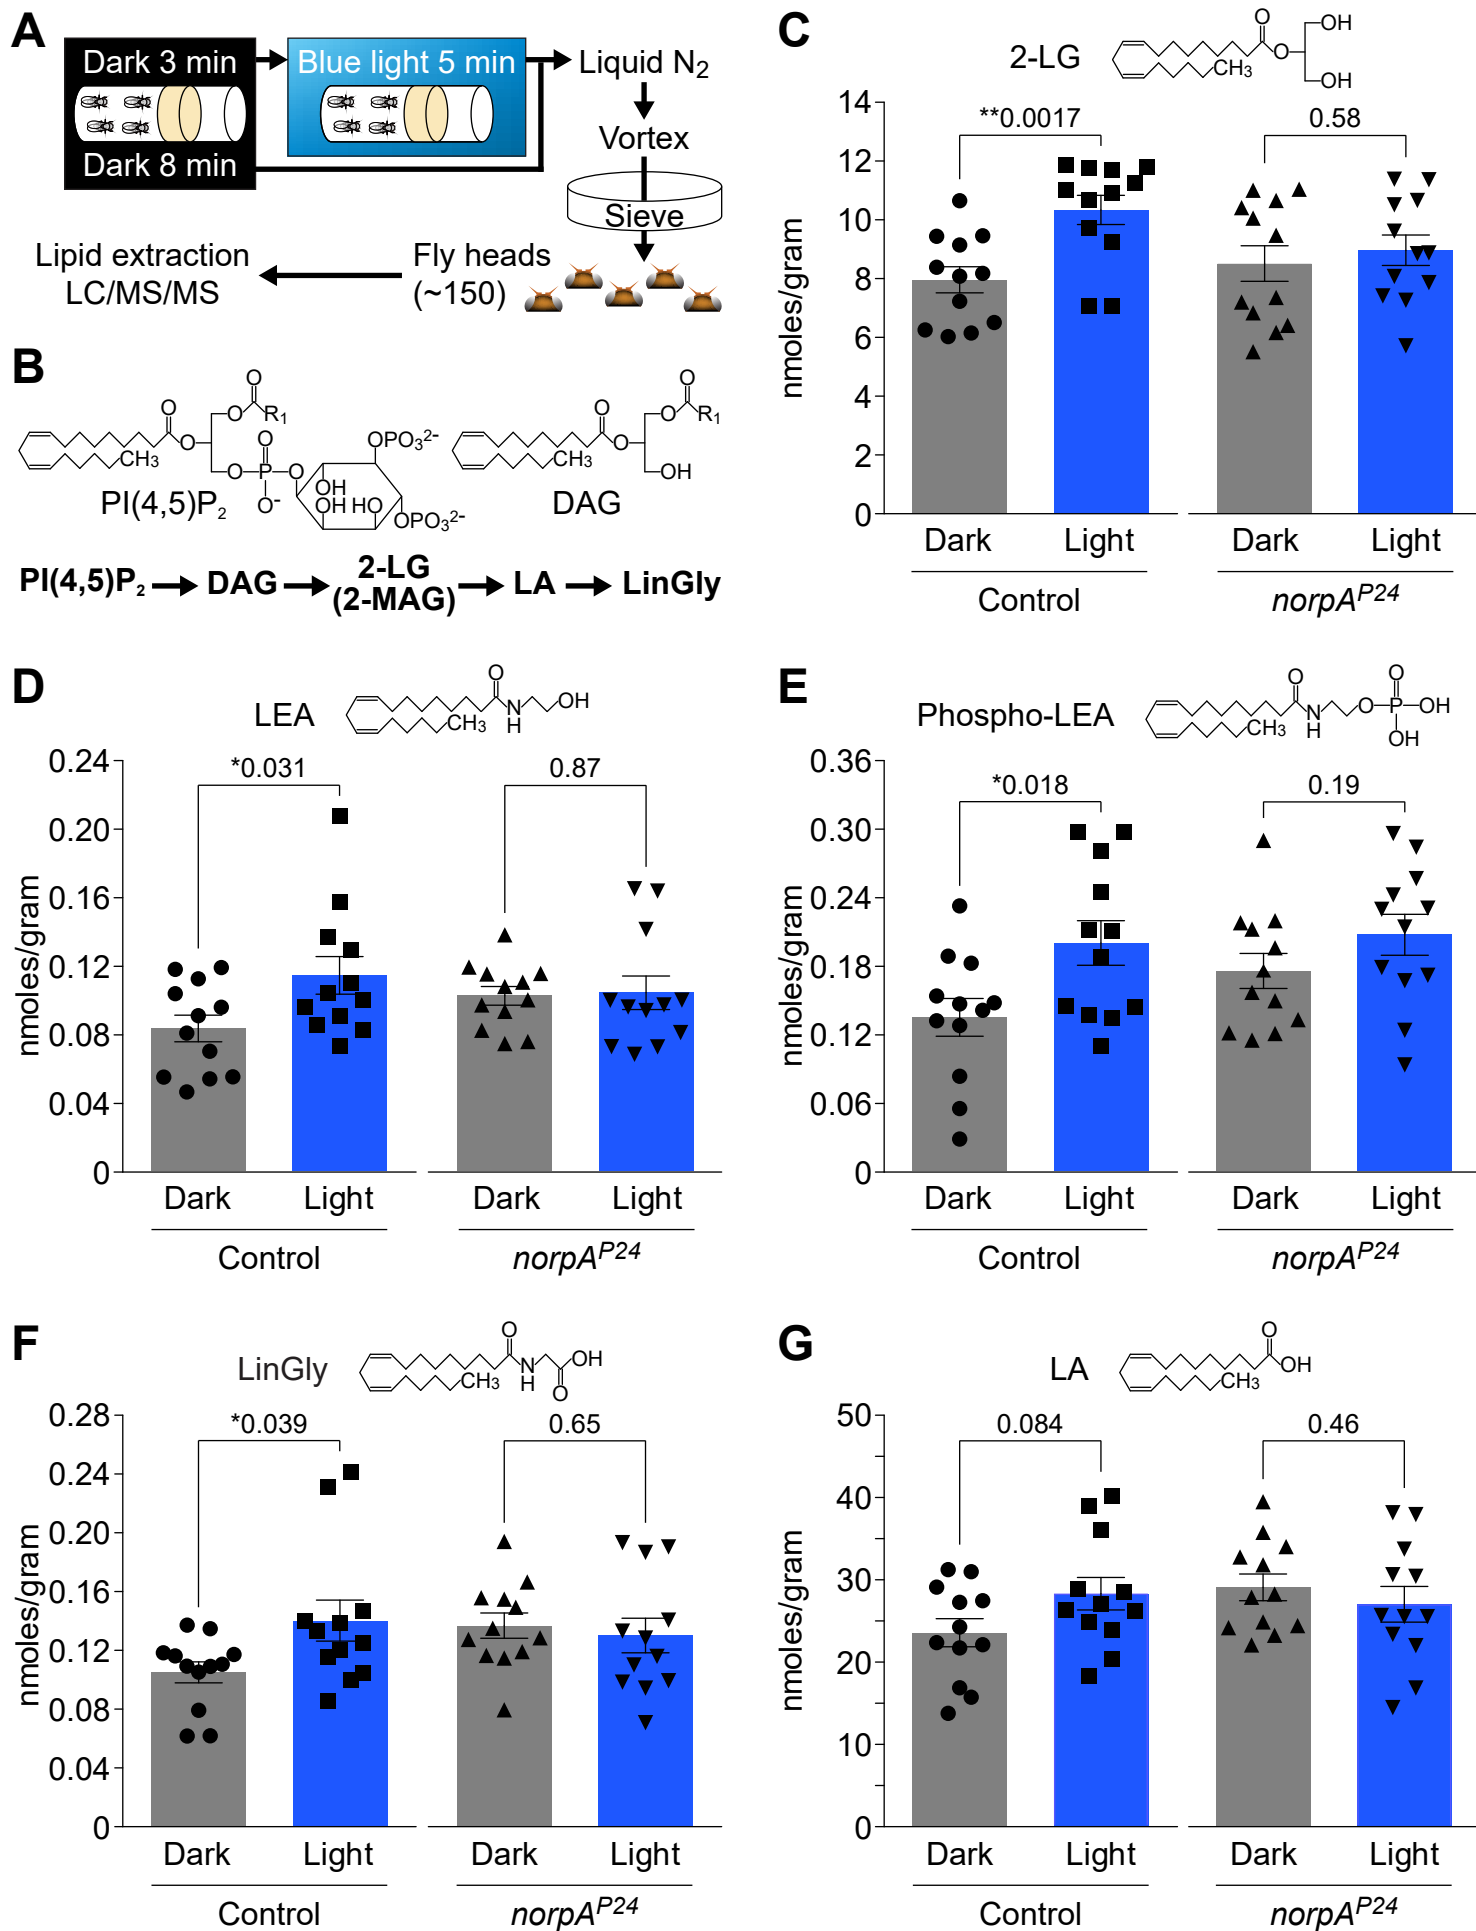

## Figure 2

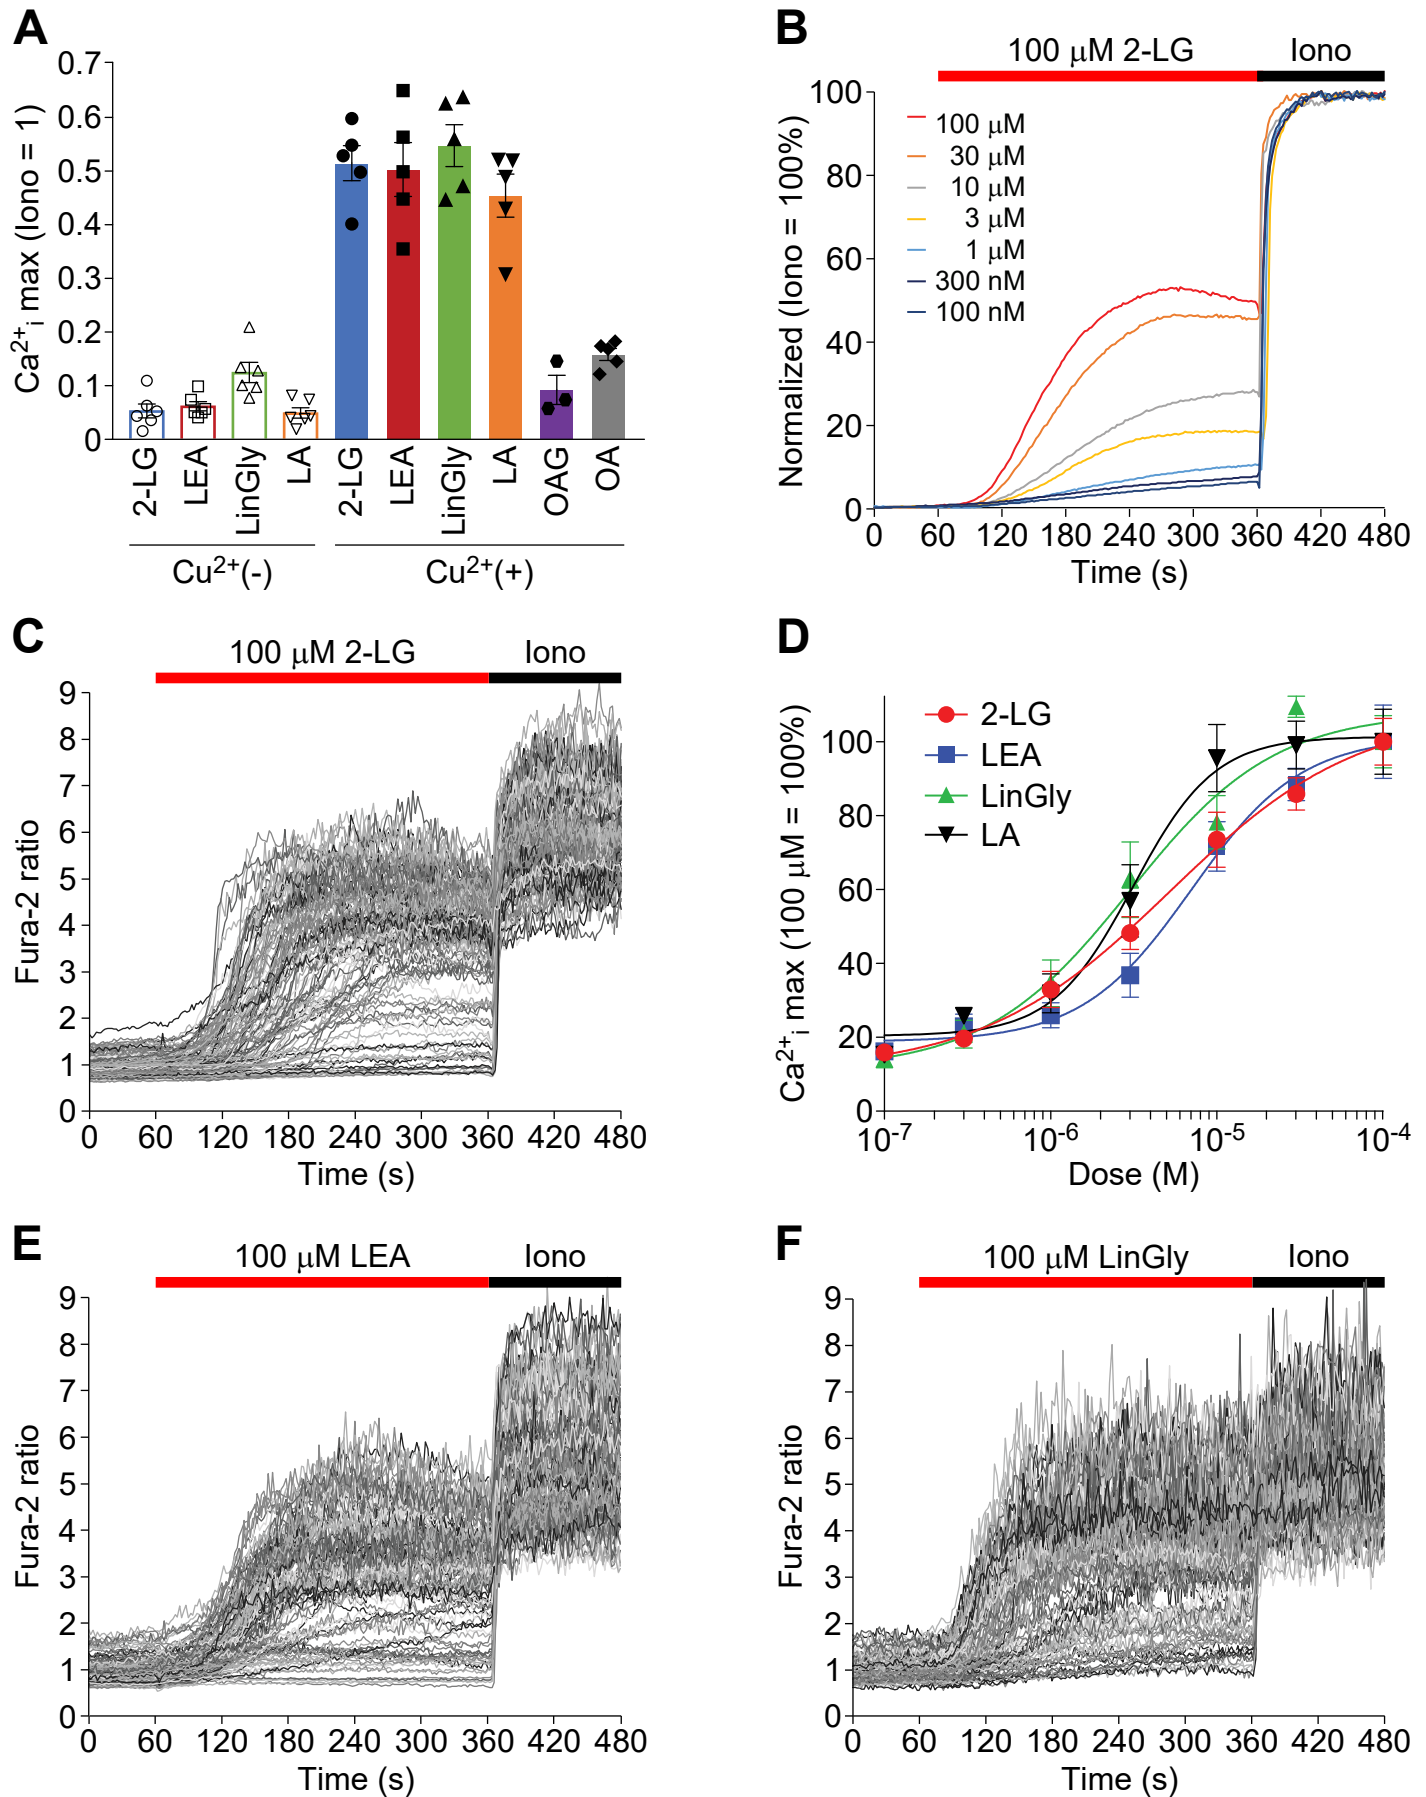

# Figure 3

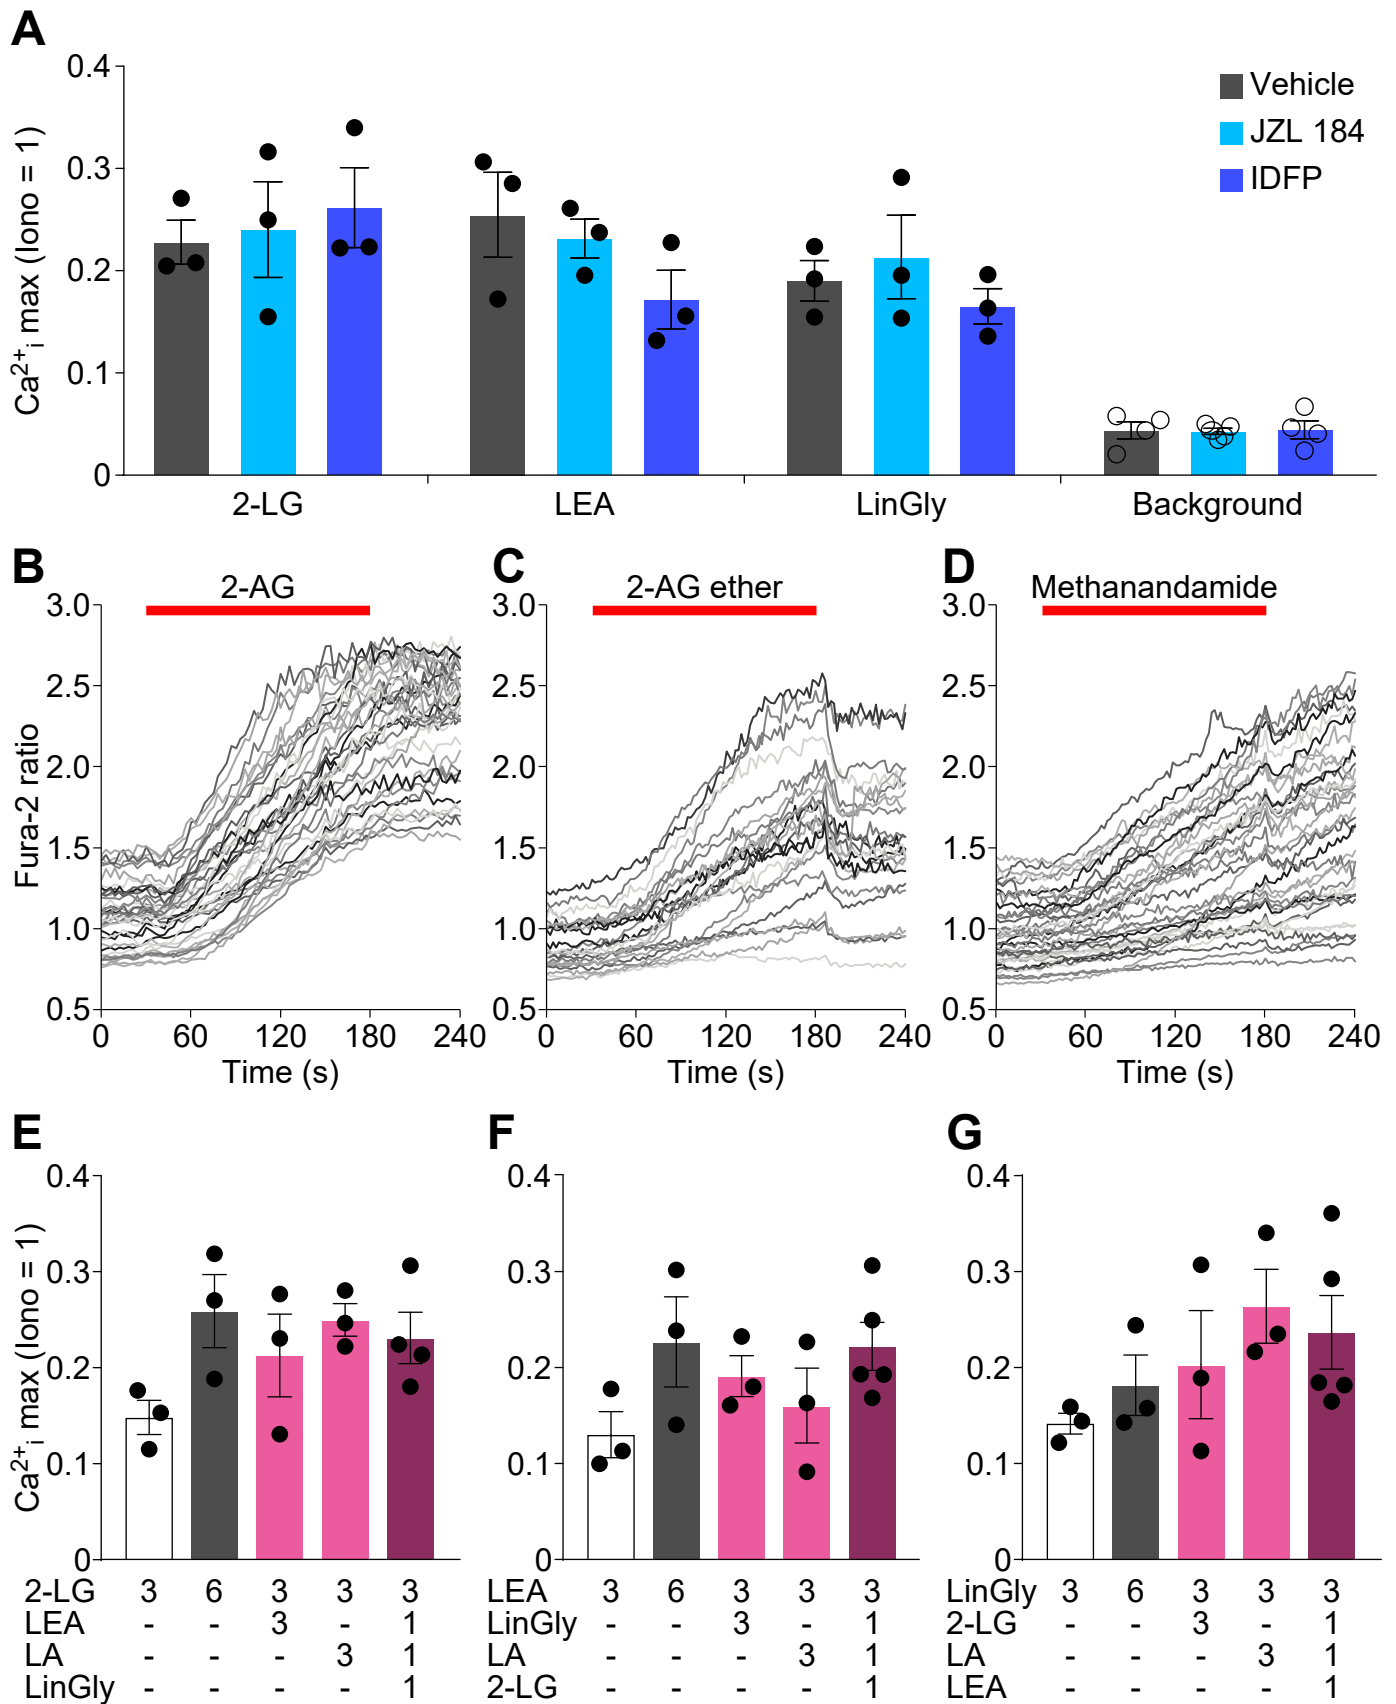

# Figure 4

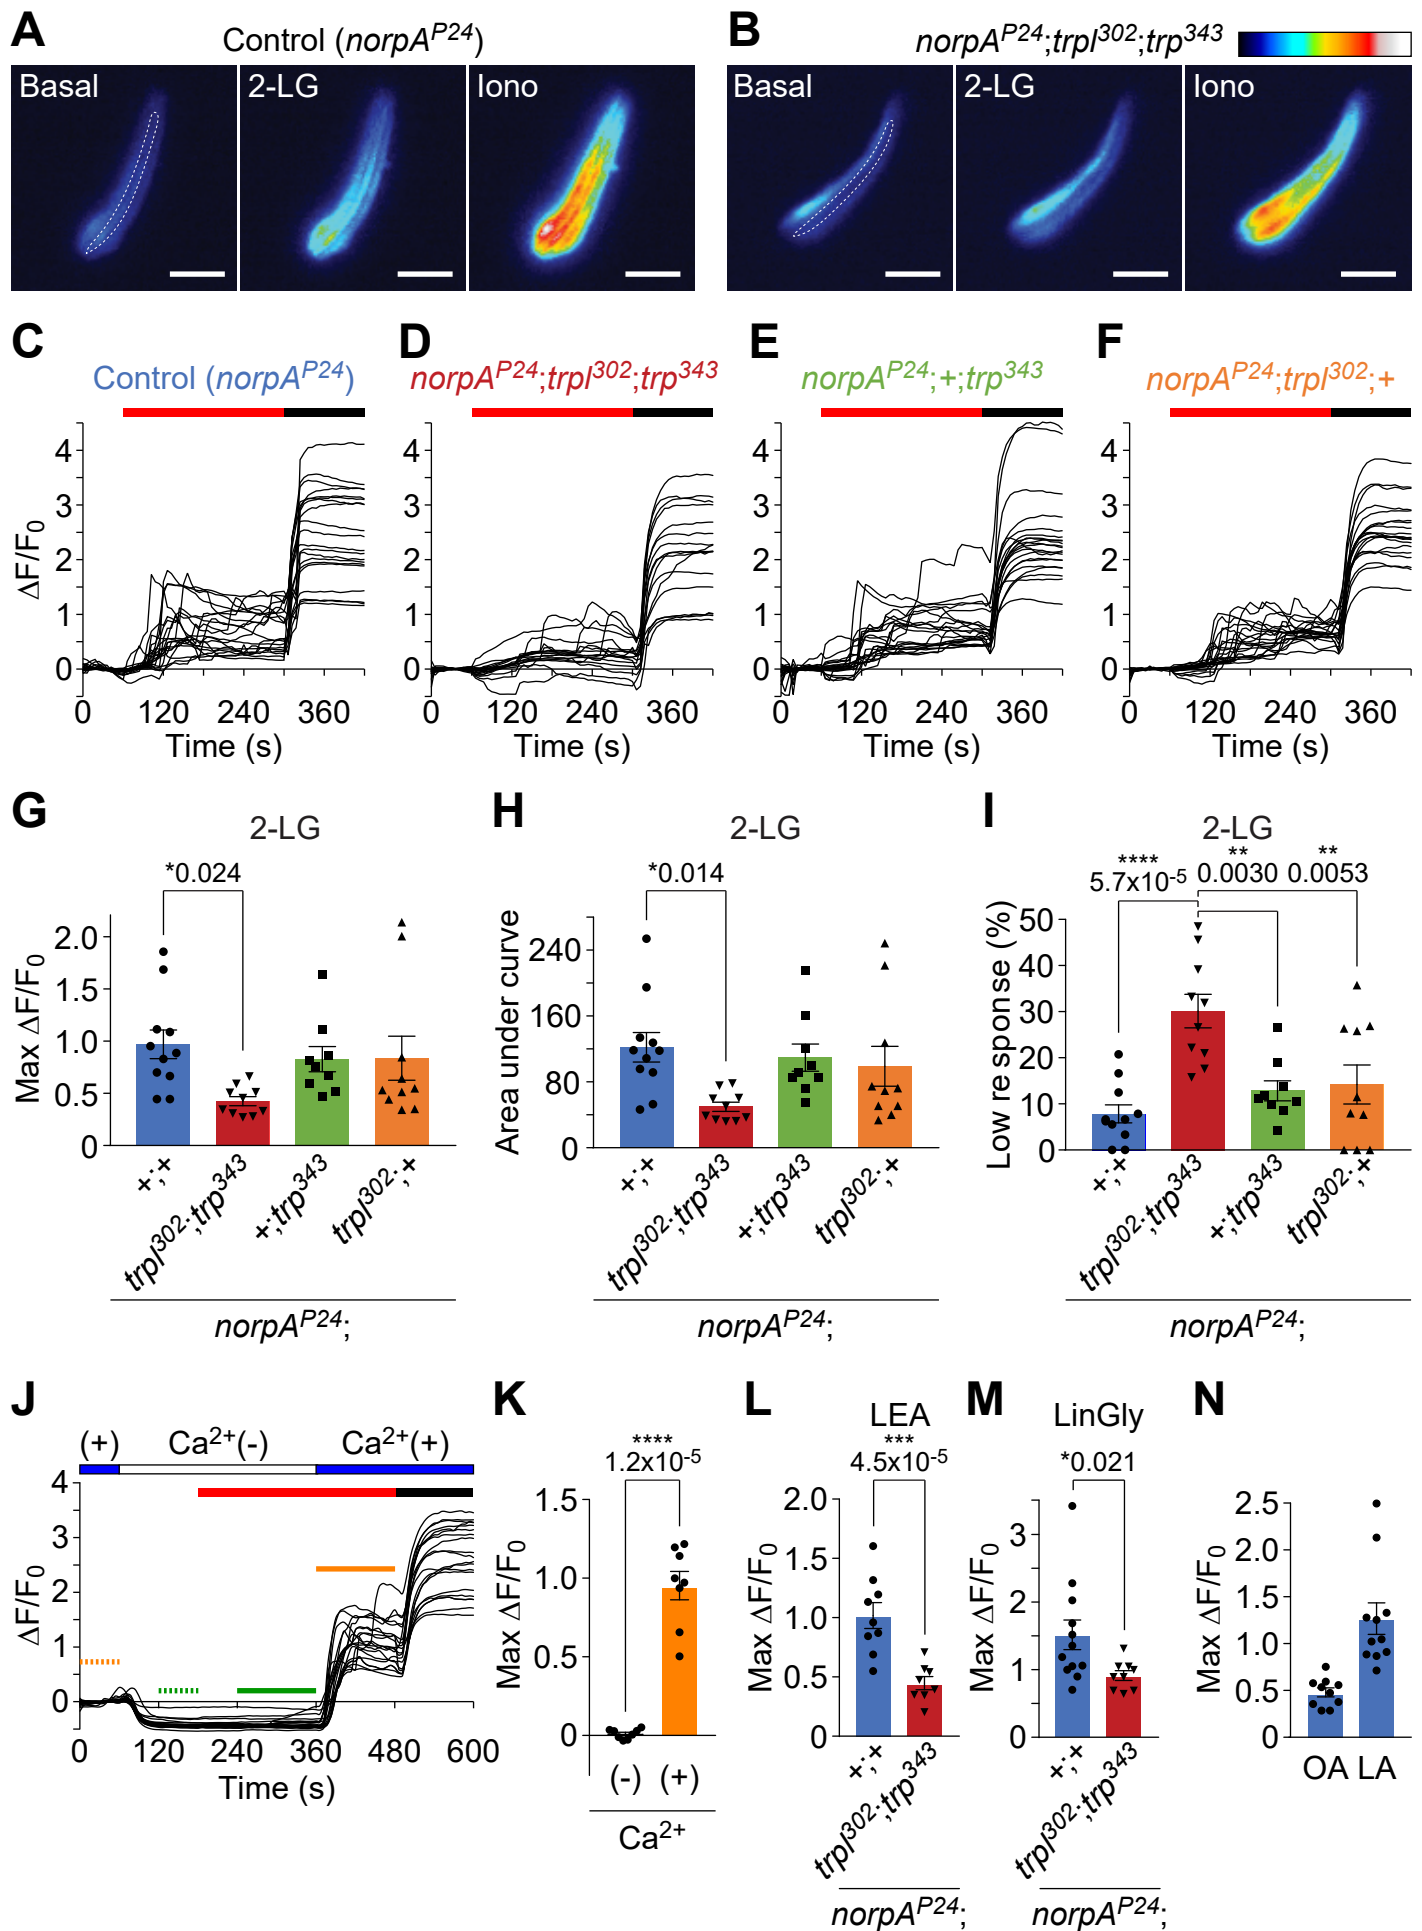

Source: http://biorxiv.org/content/10.1101/2021.06.17.448894v1.full.pdf
